21 **Abstract**

22 Caspases are a family of cysteine proteases that play an essential role in inflammation,  
23 apoptosis, cell death, and development. Here we delve into the effects caused by  
24 heterologous expression of human Caspase-1 in the yeast *Saccharomyces cerevisiae* and  
25 compare them to those of Caspase-8. Overexpression of both caspases in the  
26 heterologous model led to their activation, and caused mitochondrial depolarization, ROS  
27 production, damage to different organelles, and cell death. All these effects were  
28 dependent on their protease activity, and Caspase-8 was more aggressive than Caspase-  
29 1. Growth arrest could be at least partially explained by dysfunction of the actin  
30 cytoskeleton as a consequence of the processing of the yeast Bni1 formin, which we  
31 identify here as a likely direct substrate of both caspases. Through the modulation of the  
32 *GAL1* promoter by using different galactose:glucose ratios in the culture medium, we have  
33 established a scenario in which Caspase-1 is sufficiently expressed to become activated  
34 while yeast growth is not impaired. Finally, we used the yeast model to explore the role of  
35 death-fold domains (DD) of both caspases in their activity. Peculiarly, the DDs of either  
36 caspase showed an opposite involvement in its intrinsic activity, as the deletion of the  
37 caspase activation and recruitment domain (CARD) of Caspase-1 enhanced its activity,  
38 while the deletion of the death effector domain (DED) of Caspase-8 diminished it. We  
39 propose the yeast model as a useful and manageable tool to explore Caspase-1 structure-  
40 function relationships, the impact of mutations or the activity of putative inhibitors or  
41 regulators.

42

43 **Keywords:** Yeast, humanized yeast models, heterologous expression, caspase, death-  
44 fold domain.

45

## 46 **Abbreviations**

47 DD, death-fold domain; CARD, caspase recruitment and activation domain; CASP1, DED,  
48 death effector domain; PCD, programmed cell death; SMOC, supra-molecular organizing  
49 center; Caspase-1; CASP8, Caspase-8; ROS, reactive oxygen species; PI, propidium  
50 iodide, Rd123, rhodamine 123; DHE, dihydroethidium,; TGN, trans-Golgi network; ER,  
51 endoplasmic reticulum; WGD, whole genome deletion; SD, synthetic dextrose; SG,  
52 synthetic galactose; SR, synthetic raffinose; OD, optical density; SDS, sodium dodecyl  
53 sulfate; PMSF, phenylmethylsulfonyl fluoride; SDS-PAGE, sodium dodecyl sulfate  
54 polyacrylamide gel electrophoresis; TCA, trichloroacetic acid; DIC, differential interference  
55 contrast; YPD, yeast peptone dextrose; PBS, phosphate buffered saline.

56

## 57 **Introduction**

58 Caspases are a family of cysteine proteases that cleave their targets after aspartic acid  
59 residues, playing an essential role in inflammation, apoptosis, cell death, and development  
60 [1]. Mammalian caspases are classified into two major groups: pro-inflammatory and pro-  
61 apoptotic caspases. They are produced as zymogens that are activated by proteolysis  
62 upon diverse stimuli. Among them, Caspase-1 and Caspase-8 are two of the most deeply  
63 characterized members. Caspase-1 exerts its function as a pro-inflammatory caspase by  
64 promoting interleukin IL-1 $\beta$  activation and release via pyroptosis, a form of programmed  
65 cell death (PCD) [2-4]. Caspase-8 takes part in apoptotic PCD as an initiator caspase,  
66 upstream effector caspases in the extrinsic pathway [5]. Although they intervene in  
67 different signaling hubs, they share many structural features. Both caspases are  
68 composed of a Death-fold Domain (DD: CARD –Caspase Recruitment Domain– for

69 Caspase-1; and DEDs –Death Effector Domain– for Caspase-8), a long, and a short  
70 catalytic subunit (Fig. 1(a)) [6].

71 Under specific stimuli, Caspase-1 and Caspase-8 are recruited to macromolecular  
72 structures, known as Supramolecular-Organizing Centers (SMOCs), through heterotypic  
73 interactions between their DDs and the corresponding adaptors [7, 8]. Next, caspases  
74 dimerize and autoactivate by proteolysis. The first cleavage between the long and short  
75 catalytic subunits leads to an increase of caspase-proteolytic activity. The second  
76 cleavage, between the long subunit and the DD, releases the caspase from the SMOC  
77 and restricts its activity. Thus, active caspases transmit the signal downstream to their  
78 substrates by proteolysis. The particular SMOC to which Caspase-1 and Caspase-8 are  
79 recruited, together with target specificity, accounts for the functional divergence of these  
80 two proteins [9-11]. Caspase-1 and Caspase-8 are promiscuous enzymes and they do not  
81 recognize a strict target sequence motif. Rather, the conformational structure of the target  
82 might be more relevant for recognition than the sequence flanking the Asp residue [11-13].  
83 Despite their importance in human disease, especially in inflammatory diseases and  
84 cancer, respective to each class of caspases, the complex nature of their regulation and  
85 activity is not yet fully elucidated. Heterologous expression in genetically tractable  
86 experimental models could help in their characterization.

87 For the last 40 years, the yeast *Saccharomyces cerevisiae* has proved to be useful as a  
88 model for the functional study of human proteins and signaling pathways, partly as a  
89 consequence of the development of suitable heterologous expression tools [14]. Previous  
90 reports have shown that heterologous expression of human initiator pro-apoptotic  
91 Caspase-8 and Caspase-10 is toxic to *S. cerevisiae*. On the contrary, executioner pro-  
92 apoptotic caspases are not toxic, unless co-expressed with an initiator caspase or  
93 expressed in their truncated active form [15-19], because they need to be activated via

94 proteolysis [6]. However, there is no information available regarding the expression of pro-  
95 inflammatory caspases in yeast. These caspases deserve special attention because they  
96 are crucial in defense against pathogens, cancer, auto-immune diseases, and sepsis, as  
97 part of the innate immunity [20].

98 In this study, we heterologously express human Caspase-1 in yeast for the first time to our  
99 knowledge, and compare its effects with those of Caspase-8. We demonstrate that  
100 Caspase-1 autoactivates and becomes toxic in yeast when overexpressed due to its own  
101 proteolytic activity. Moreover, the reduction of the levels of expression allows us to  
102 modulate this toxicity. This model provides a novel platform to readily assess the function  
103 of human Caspase-1 mutations, its inhibitors and regulators in a manageable *in vivo*  
104 experimental setting.

105

## 106 **Results and Discussion**

### 107 **Expression of human Caspase-1, like Caspase-8, inhibits yeast cell growth**

108 Pro-inflammatory Caspase-1 and pro-apoptotic Caspase-8 share a similar domain  
109 architecture and distribution of proteolytic sites for autoactivation (Fig 1(a)). To study  
110 whether pro-inflammatory Caspase-1 might exert toxic effects on the yeast cell, as  
111 previously reported for initiator Caspase-8 [16, 18, 19], we cloned the cDNAs encoding for  
112 both human caspases in the same expression vector under the control of galactose-  
113 inducible *GAL1* promoter. *S. cerevisiae* cells expressing each of these caspases failed to  
114 grow on solid galactose-containing media (Fig. 1(b)), and significantly decelerated growth  
115 in liquid cultures (Fig. 1(c)). The doubling time calculated through the growth curve raised  
116 from 2.5 h for control cells to 4.5 h for cells expressing Caspase-1 and almost 10 h for  
117 cells expressing Caspase-8. Biomass after 24 h of culture in galactose-based liquid

118 medium was reduced by 2-fold for Caspase 1- and by 6-fold by Caspase-8 as compared to  
119 the empty vector control (Fig 1(c)). Our results suggest that both human caspases become  
120 active in our model by sheer overproduction in the absence of further stimuli, probably  
121 because they self-interact bypassing the requirement for nucleating factors. This supports  
122 the proximity-driven dimerization model proposed for the pro-apoptotic initiator caspases  
123 [21], which would also extend to pro-inflammatory Caspase-1. The severe toxicity of  
124 Caspase-8 in yeast is consistent with previous reports [16, 18, 19]. The relatively milder  
125 toxicity of Caspase-1 observed in liquid culture could be due either to a lower intrinsic  
126 activity or autoactivation ability, or to a differential specificity on essential heterologous  
127 protein targets in yeast.

#### 128 **Caspase-1 and Caspase-8 are self-processed in yeast**

129 The activation of executioner pro-apoptotic caspases and pro-inflammatory caspases  
130 requires dimerization and autoproteolysis of the pro-caspase at the cleavage sites that link  
131 the long and short catalytic subunits [6]. By Western blotting analyses, we demonstrated  
132 that both caspases were efficiently expressed and self-processed in yeast into their  
133 predicted active forms, as we were able to detect protein bands corresponding to the p33  
134 and p20 cleaved subunits for Caspase-1, and the p41 and p18 cleaved subunits for  
135 Caspase-8 (Fig. 1(d)). Thus, expression of Caspase-1 in *S. cerevisiae*, like that of  
136 Caspase-8, leads to its auto-processing and activation.

#### 137 **Caspase-1 and Caspase-8 protease activity and Caspase-1 autoprocessing are** 138 **essential for their toxicity in yeast**

139 To learn whether the toxic effect caused in yeast cells by both caspases reflected their  
140 protease activity, we generated a catalytically inactive mutant for each caspase by site-  
141 directed mutagenesis, in which the cysteine residues located at their respective active

142 centers were replaced by alanine (Caspase-1 C285A and Caspase-8 C360A). As  
143 expected, these mutant proteins neither impaired yeast growth (Fig. 2(a)), nor could we  
144 detect significant amounts of their proteolyzed subunits by Western blotting on yeast  
145 lysates (Fig. 2(b)). Thus, we conclude that caspase proteolytic activity is necessary for  
146 caspase processing, autoactivation, and toxicity in yeast. Besides, we cloned in the same  
147 vector the uncleavable Caspase-1 D5N mutant, in which the five Asp residues that allow  
148 Caspase-1 autoprocessing are mutated to Asn, an amino acid that it is not targeted by this  
149 protease [22]. As with catalytically inactive Caspase-1, yeast growth was not impaired by  
150 expression of the D5N mutant (Fig. 2(a)) and we could not detect Caspase-1 proteolyzed  
151 subunits (Fig. 2(b)), emphasizing that autoprocessing of Caspase-1 is also necessary for  
152 its activation and toxicity. However, we observed lower expression levels of the D5N  
153 mutant version as compared to wild type Caspase-1, suggesting that these mutations  
154 affect protein stability, which could also contribute to the lack of toxicity observed.

### 155 **Oxidative damage exerted by Caspase-1 in *S. cerevisiae* is less severe than that of** 156 **Caspase-8**

157 The cell death phenotype induced by pro-apoptotic initiator caspases in yeast is  
158 characterized by reactive oxygen species (ROS) production, decrease in cell viability, and  
159 propidium iodide (PI) uptake [16, 19]. To gain a better insight into the Caspase-1 terminal  
160 phenotype as compared to that of Caspase-8, we measured mitochondrial membrane  
161 depolarization and intracellular ROS production in both Caspase-1- and Caspase-8-  
162 expressing cells by staining them respectively with rhodamine 123 (Rd123) and  
163 dihydroethidium (DHE), after 5 h of induction in galactose-containing medium, and  
164 analyzing them by flow cytometry (Fig. 3(a)). We found a statistically significant increase in  
165 membrane depolarization and ROS production for both caspases as compared to control  
166 cells, which was higher with Caspase-8 than with Caspase-1. Then we evaluated whether

167 this phenotype was accompanied by a reduction in cell viability and cell death under the  
168 same conditions. Cell viability was measured based on the ability of yeasts to form  
169 microcolonies and we observed a significant decrease in cell viability for both caspases  
170 (Fig. 3(b)). In addition, cell death was analyzed by flow cytometry using PI as an indicator  
171 of loss of membrane selective permeability. Likewise, we found a statistically significant  
172 differential increase in cell death for both caspases (Fig. 3(a)). Taken together, these  
173 results indicate that the expression of Caspase-1 and Caspase-8 leads to mitochondrial  
174 membrane depolarization and ROS production, as well as a decrease in cell viability and  
175 cell death. Furthermore, consistent with our results above, Caspase-8 effects are stronger  
176 in all cases.

#### 177 **Expression of Caspase-1 and Caspase-8 differentially affects organelle morphology** 178 **in yeast**

179 We investigated the putative damages that these caspases might be causing to cellular  
180 organelles. First, to visualize mitochondrial organization, we co-expressed each caspase  
181 with an *Ilv6*-mCherry fusion as a mitochondrial marker. The mitochondrial tubular network  
182 was disrupted in both cases, although there were some differences between the two  
183 caspases. While mitochondria from cells expressing Caspase-1 formed large aggregates,  
184 those from cells expressing Caspase-8 were fragmented (Fig. 4(a)). Secondly, we  
185 assessed trans-Golgi network (TGN) integrity by expressing caspases in a strain marked  
186 with the TGN protein *Sec7*-GFP. Caspase-1 expression did not affect TGN, while  
187 Caspase-8 caused the aggregation of Golgi cisternae into one or two big spots in around  
188 30% of the cells (Fig. 4(b)). Thirdly, we studied vacuole morphology by expressing each  
189 caspase in a strain tagged with the vacuolar protein *Vph1*-GFP. Both caspases caused an  
190 increment of the vacuolar diameter, although the effect was more prominent in the case of  
191 caspase-8 (Fig. 4(c)). Finally, we evaluated the endoplasmic reticulum (ER) structure by



192 co-expressing each caspase with Sec63-mRFP as an ER marker. In this case, no  
193 differences with the control were perceived for Caspase-1-expressing cells, while 30% of  
194 Caspase-8-expressing cells displayed an expanded ER (Fig 4(d)). Previous studies report  
195 that ER expansion might be a consequence of increased ER membrane biogenesis to  
196 adapt to different stress signals [23]. In sum, expression of both caspases in yeast leads to  
197 significant organellar alterations, but the effect of caspase-8 is more severe than that of  
198 Caspase-1, especially at the ER and Golgi levels.

### 199 **The yeast actin cytoskeleton is altered by expression of human caspases**

200 As shown above, the dramatic growth defect observed in heterologous caspase-  
201 expressing yeast cells was accompanied by a modest loss of plasma membrane  
202 permeability, as determined by vital PI staining. This is consistent with budding arrest  
203 rather than cell lysis. However, microscopic observations did not hint a specific cell cycle  
204 arrest pattern in these cultures (data not shown), so we investigated the impact of  
205 caspases expression on the actin cytoskeleton, as it drives essential polarized secretion to  
206 promote and maintain budding. Actin staining with rhodamine-conjugated phalloidin  
207 revealed that, instead polarized patches at the growing bud, about 10% of the cells  
208 expressing any of both caspases displayed abnormal long thick actin cytoplasmic  
209 structures, which were never observed in control cultures (Fig 5(a)). These observations  
210 suggest that growth arrest in caspase-expressing yeast cells could be at least partially  
211 attributed to dysfunction of the actin cytoskeleton.

212 Formins are actin-nucleating proteins that function by promoting and regulating the  
213 assembly of the actin cytoskeleton in eukaryotic cells [24]. Previous studies reported that  
214 loss of the N-terminal domain of the yeast formin Bni1 led to the formation of long  
215 cytoplasmic actin filamentous structures, resembling the ones here induced by caspases,  
216 due to uncontrolled actin polymerization caused by dysregulation of this protein [25, 26].

217 We hypothesized that the observed phenotype could be a consequence of Bni1  
218 proteolysis by Caspase-1 and -8 in a region proximal to the N-terminal domain and that, in  
219 such case, the formation of these structures should be prevented in a *bni1Δ* strain.  
220 Therefore, we stained the actin cytoskeleton in caspase-expressing yeast cells individually  
221 deleted for the genes encoding each of the formins (Bni1 and Bnr1). We could observe the  
222 formation of these abnormal actin structures in the *bnr1Δ* but not on the *bni1Δ* background  
223 (Fig 5(a)), supporting our postulate that Bni1 cleavage is responsible for this phenomenon.  
224 To further confirm this hypothesis, we co-expressed a Bni1-GFP fusion with each caspase  
225 and analyzed yeast lysates by Western blotting with anti-GFP antibodies. We detected that  
226 both caspases degraded Bni1, particularly Caspase-8, as the levels of Bni1-GFP  
227 decreased and some degradation bands –absent in control lysates– appeared (Fig. 5(b)).  
228 This implies that Bni1 is a direct substrate of Caspase-1 and 8 in yeast, and that the  
229 collapse of the actin cytoskeleton into these abnormal filaments as a consequence of Bni1  
230 cleavage likely contributes to yeast growth arrest. To our knowledge, no previous works  
231 have described any direct substrates of human caspases in yeast. Disruption of the  
232 mitochondrial network, induction of ER-phagy, or ROS production are rather unspecific  
233 damages and could account for many different causes. However, the formation of these  
234 aberrant actin structures is more specific and could be an interesting tool to assess  
235 caspase activity in yeast by microscopy or immunoblot.

236 **Auto-processing of Caspase-1, but not Caspase-8, can be modulated by adjusting**  
237 **expression levels**

238 The development of yeast-based models for the study of human pathways should be more  
239 versatile if finely tuned regulatory mechanisms can be reproduced in the heterologous  
240 model. Thus, although a growth inhibition readout may be optimal for devising  
241 pharmacologic or genetic screens, in potential Synthetic Biology settings that imply co-

242 expression of caspase regulators or substrates, high toxicity should be avoided. In our  
243 model, the overexpression of Caspase-1 results presumably in its dimerization and auto-  
244 processing, thus leading to toxicity. However, we show above that its effects are not as  
245 dramatic as those caused by pro-apoptotic Caspase-8, likely due to a less efficient  
246 activation by auto-cleavage. We hypothesized that restricting Caspase-1 expression levels  
247 could prevent its dimerization and consequently reduce its toxicity in yeast. It has been  
248 reported that *GAL1* promoter induction depends on the ratio between galactose and  
249 glucose available in the culture medium, which that determines galactose uptake, rather  
250 than on the total amount of galactose. It was suggested that the competitive binding of  
251 these sugars to hexose transporters is responsible for this phenomenon [27]. Thus, we  
252 cultured Caspase-1 transformants in media containing different galactose/glucose ratios  
253 ranging from 1 to 10, always preserving a final concentration of sugars of 2%, and after 5 h  
254 of induction we analyzed Caspase-1 expression by Western blotting. As shown in Fig.  
255 6(a), we confirmed that not only the level of expression of this protein but also its relative  
256 auto-processing capability increased gradually as the Gal/Glu ratio augmented. At those  
257 ratios for which pro-Caspase-1 was detectable but the signal for its p33 and p20 subunits  
258 was weak compared to control with galactose, caspase activity should be low. To test  
259 whether this modulation of Caspase-1 expression and autoprocessing correlated with a  
260 reduction in toxicity, we performed a spot assay using the same sugar ratios in growth  
261 media (Fig. 6(b)). Yeast growth was observed in all Gal/Glu ratios. However, in the higher  
262 ratios (8.5 and 10) we detected a reduction in the size of colonies that reflects that  
263 Caspase-1 was being processed to sufficient active form. To confirm that threshold  
264 concentrations for autoprocessing did not dramatically compromise viability, we chose  
265  $R(\text{Gal}/\text{Glu})=5.5$  and  $R(\text{Gal}/\text{Glu})=8.5$  among the different ratios tested and analyzed yeast  
266 growth in liquid media after 24 h of induction. The 5.5 Gal/Glu ratio allowed us to express  
267 an inactive Caspase-1 (p33 and p20 bands were barely detectable in cell extracts) and the

268 8.5 Glu/Gal ratio led to an active Caspase-1 (p33 and p20 bands indicated the presence of  
269 the active protein). Like in solid media, although we observed a statistically significant  
270 decrease in OD<sub>600</sub> due to Caspase-1 expression in both the control with galactose alone  
271 and R(Gal/Glu)=8.5, toxicity was highly reduced in the latter condition (Fig. 6(c)). Thus, this  
272 experimental setting should provide a sensitive platform for evaluating Caspase-1 activity  
273 in viable yeast cells in the future.

274 In contrast, we could not modulate Caspase-8 activity under the same conditions tested for  
275 Caspase-1 (Fig. 6(d)) or even at lower Gal/Glu ratios ranging from 0.25 to 4 (Fig. S1). For  
276  $R(\text{Gal}/\text{Glu}) \leq 1$ , we could not detect Caspase-8 expression over the control in glucose, and  
277 for  $R(\text{Gal}/\text{Glu}) \geq 2.5$  Caspase-8 was already autoactivated.

#### 278 **Deletion of Caspase-1 CARD and Caspase-8 DED domains have opposite effects**

279 To test the strength of our model in detecting changes in caspase activity, we produced a  
280 truncated version of each caspase lacking its DD (Caspase-1  $\Delta$ CARD and Caspase-8  
281  $\Delta$ DED, respectively). These domains facilitate the recruitment and dimerization of  
282 caspases [5, 28, 29], so we expected that their deletion would reduce protease-dependent  
283 toxicity. Contrary to these expectations, the truncated versions of these proteins were as  
284 toxic as their wild-type counterparts in a spot assay under *GAL1*-inducing conditions, as  
285 shown in Fig. 7(a), indicating that DD-mediated dimerization is not a strict prerequisite for  
286 their activation. However, when we performed PI staining after 5 h of induction in a  
287 galactose-containing medium and analyzed cells by flow cytometry, we observed opposite  
288 effects for each truncated caspase. The elimination of the CARD domain in Caspase-1  
289 increased the percentage of PI+ cells compared to the full length caspase, while deletion  
290 of DED domain for Caspase-8 decreased the percentage of cells that lost selective  
291 permeability (Fig. 7(b)). We then checked whether these mutants were subject to auto-  
292 cleavage in yeast like the wild-type proteins. Indeed, we could detect by immunoblot of cell

293 lysates the p20 subunit for Caspase-1  $\Delta$ CARD and the p18 subunit for Caspase-8  $\Delta$ DED  
294 (Fig. 7(c)).

295 Next, we used the approach described in the previous section for modulating the *GAL1*  
296 promoter to verify the increment of Caspase-1 activity in the absence of its CARD domain,  
297 and the decrease of Caspase-8 activity in the absence of its DED domain. In a spot assay  
298 using ratios of galactose/glucose ranging from 1 to 10, we could observe a gradual  
299 increase of toxicity for each caspase (Fig. 8(a)). Consistent with PI staining, cell growth  
300 impairment and decrease in colony size appeared at lower ratios –corresponding to lower  
301 expression levels of the corresponding protein– for Caspase-1  $\Delta$ CARD than the full-length  
302 protein, and at higher ratios for Caspase-8  $\Delta$ DED mutant than for the corresponding full-  
303 length caspase. Next we performed Western blotting from cells expressing Caspase-1  
304  $\Delta$ CARD and Caspase-8  $\Delta$ DED, following an analogous strategy to the one described for  
305 Caspase-1 and Caspase-8 in Fig. 6(a,d). As shown in Fig. 8(b), Caspase-1  $\Delta$ CARD p20  
306 cleaved subunit could be detected at very low ratios of Gal/Glu and gradually increased as  
307 the percentage of galactose raised, while this subunit could only be detected at high ratios  
308 of Gal/Glu for the full-length protein (see Fig. 6(a)). On the contrary, the cleaved p18  
309 subunit from Caspase-8  $\Delta$ DED was detected in low levels in lysates from the increasing  
310 Gal/Glu ratios as compared to the galactose alone sample.

311 These results may reflect that, although DDs facilitate caspase dimerization and activation  
312 under physiological conditions by bringing closer caspase monomers to their  
313 corresponding SMOCs, at higher expression levels caspase monomers may interact with  
314 each other through other regions of the protein. Indeed, in our model the CARD domain  
315 restrains Caspase-1 activity. The proximity-driven dimerization model is compatible with  
316 the induced conformation model [21], which argues that the interaction of caspases with  
317 the SMOCs ends up in their activation because it triggers a conformational change. In this

318 sense, CARD orientation under basal conditions may prevent Caspase-1 activation, and  
319 the interaction with its SMOC, the inflammasome, elicits a conformational change within  
320 this domain that allows Caspase-1 activation. The overexpression of a truncated version of  
321 Caspase-1 without CARD could bypass this need for a conformational change,  
322 consequently leading to a higher Caspase-1 activity. However, removal of DED reduced  
323 Caspase-8 toxicity, suggesting these DD might play different roles depending on the  
324 caspase. The physiological relevance of these results needs to be assessed in a higher  
325 eukaryote model. In human cells, caspases must be tightly regulated to preserve cell  
326 integrity, but the proteins involved in their control are probably missing in *S. cerevisiae*, as  
327 it lacks pathways closely related to those in which caspase-1 or -8 are involved. Our model  
328 provides a neat platform in which we can assess *in vivo* the intrinsic activity of caspases in  
329 the absence of other layers of regulation.

330 Overall, this study provides evidence that the yeast *S. cerevisiae* can be exploited as an  
331 alternative tool to study the structure, activity, and regulation of pro-inflammatory Caspase-  
332 1, as has been previously reported for Caspase-8. The expression of both caspases  
333 severely impairs yeast growth, and this readout can be appropriate for the design of  
334 pharmacologic or genetic screens. Meanwhile, the expression of sublethal concentrations  
335 of Caspase-1 with the right Galactose/Glucose ratio might be a more sensitive setting for  
336 applications such as the characterization of Caspase-1 substrates or regulators.

## 337 **Materials and methods**

### 338 **Strains, media and growth conditions**

339 The BY4741 *S. cerevisiae* strain (*MAT $\alpha$  his3 $\Delta$ 1 leu2 $\Delta$ 0 met15 $\Delta$ 0 ura3 $\Delta$ 0*) or its  
340 *trp1::kanMX4* derivative from the whole genome deletion (WGD) collection were used in all  
341 experiments unless otherwise stated. DLY35 (*MAT $\alpha$  his3 $\Delta$ 1 leu2 $\Delta$ 0 ura3 $\Delta$ 0 lys2 $\Delta$ 0 SEC7-*

342 *GFP(S65T)::KanMX*) strain (a gift from Mara C. Duncan, University of North Carolina, NC,  
343 USA)[30] was used to visualize the trans-Golgi network, and MVY04 strain (isogenic to  
344 BY4741, *VPH1-GFP-URA3*) to visualize vacuolar membrane. MVY04 strain was obtained  
345 by digesting the plasmid ZJOM153 (Addgene #268960) with *NheI* and *StuI* and integrating  
346 the resulting *VPH1-GFP-URA3* fragment in the BY4741 strain. BY4741 *bnr1Δ* and BY4741  
347 *bni1Δ* strains were obtained from the WGD collection (Euroscarf). BY4741 *Bni1-GFP-*  
348 *HIS3MX6* strain was obtained from the Yeast-GFP Clone Collection from UCSF. The  
349 *Escherichia coli* DH5α strain was used for routine molecular biology techniques.

350 Synthetic dextrose (SD) medium contained 2% glucose, 0.17% yeast nitrogen base  
351 without amino acids, 0.5% ammonium sulfate and 0.12% synthetic amino acid drop-out  
352 mixture, lacking appropriate amino acids and nucleic acid bases to maintain selection for  
353 plasmids. For synthetic galactose (SG) and synthetic raffinose (SR) media, glucose was  
354 replaced with 2% (w/v) galactose or 1.5% (w/v) raffinose, respectively. All the media  
355 components were autoclaved together. *GAL1*-driven protein induction in liquid medium  
356 was performed by growing cells in SR to mid-exponential phase and then refreshing the  
357 cultures to an OD<sub>600</sub> of 0.3 directly with SG lacking the appropriate amino acids to maintain  
358 selection for plasmids for 5 h. Yeast strains were incubated at 30 °C.

359 For *GAL1* promoter modulation experiments, *GAL1*-driven protein induction in liquid  
360 medium and growth assays were performed as described above but instead of SG media,  
361 synthetic media containing different proportions of galactose and glucose was used. The  
362 final concentration of sugars was always 2% (w/v). In this case, the sugars were prepared  
363 at a 10x concentration and autoclaved separately from the other medium components.

## 364 **Plasmids**

365 Transformation of *E. coli* and *S. cerevisiae* and other basic molecular biology methods  
366 were carried out using standard procedures. *CASP1* and *CASP1*  $\Delta$ *CARD* genes were  
367 amplified by standard PCR from pCl-Caspase-1 (a gift of Jonathan Kagan, Boston  
368 Children's Hospital, MA, USA) using primers *CASP1*\_Fw, *CASP1*(*CARD*)\_Fw and  
369 *CASP1*\_Rv respectively, all designed with *attB* flanking sites. *CASP1* *D5N* uncleavable  
370 mutant was amplified by standard PCR from pLEX 307-FLAG-CASP1 *D5N* (a gift from  
371 Daniel A. Bachovchin, Memorial Sloan Kettering Cancer Center, NY, USA) [22] using the  
372 same primers as for *CASP1*. *CASP8* and *CASP8*  $\Delta$ *DED* genes were amplified by standard  
373 PCR from pcDNA3-CASP8 (a gift from Faustino Mollinedo, CIB-CSIC, Madrid, Spain)  
374 using primers *CASP8*\_Fw, *CASP8*(*DED*)\_Fw and *CASP8*\_Rv respectively, all designed  
375 with *attB* flanking sites. See Table 1 for primer sequences. The *attB*-flanked PCR products  
376 were cloned into pDONR221 vector by BP Gateway reaction (Invitrogen™) to generate  
377 entry clones. Subsequently, the inserts from the entry clones were subcloned into  
378 pAG413GAL-ccdB and pAG416GAL-ccdB vectors (Addgene kit #1000000011) [31] by LR  
379 Gateway reaction (Invitrogen™), generating the plasmids pGA413-Caspase-1, pAG413-  
380 Caspase-8, pAG416-Caspase-1, and pAG416-Caspase-8.

381 Caspase-1 C285A and Caspase-8 C360A catalytically inactive mutants were obtained by  
382 site-directed mutagenesis performed on their respective entry clone, using primers  
383 *CASP1*(C285A)\_Fw and *CASP1*(C285A)\_Rv primers for Caspase-1 C285A and  
384 *CASP8*(C360A)\_Fw *CASP8*(C360A)\_Rv primers for Caspase-8 C360A. Primers are listed  
385 in Table 1. Subsequently, the inserts from the entry clones were subcloned into  
386 pAG413GAL-ccdB plasmid by LR Gateway reaction, generating the plasmids pAG413-  
387 Caspase-1 C285A and pAG413-Caspase-8 C360A.



388 The mitochondrial marker Ilv6-mCherry, encoded in the plasmid YEplac112-Ilv6-mCherry,  
389 has previously been described [32]. The ER marker Sec63-mRFP, encoded in plasmid  
390 pSM1959 (pRS425-Sec63-mRFP), was obtained from Addgene (#41837).

### 391 **Western blotting assays**

392 Western blotting assays were carried out by standard techniques. Cells were harvested by  
393 centrifugation and disrupted by bead beating with a FastPrep 24 (MP Biomedicals) in 50  
394 mM Tris-HCl pH 7.5 containing 10% glycerol, 0.1% NP-40, 1% Triton X-100, 0.1% sodium  
395 dodecyl sulfate (SDS), 150 mM NaCl, 5 mM EDTA, 50 mM NaF, 50 mM glycerol  
396 phosphate, 5 mM Na<sub>2</sub>P<sub>2</sub>O<sub>7</sub>, 1 mM sodium orthovanadate, 3 mM Phenylmethylsulfonyl  
397 fluoride (PMSF), and Pierce Protease Inhibitor (ThermoFisher). Lysates were cleared by  
398 centrifugation at 4°C and protein concentrations were determined by measuring the OD<sub>280</sub>.  
399 Proteins were resolved by sodium dodecyl sulfate polyacrylamide gel electrophoresis  
400 (SDS-PAGE) in 10% acrylamide gels, and transferred onto nitrocellulose membranes 1h at  
401 110V. For experiments with Bni1-GFP, cells were harvested by centrifugation and  
402 disrupted with 1.85 M NaOH 7,4% β-mercaptoethanol for 10 min and trichloroacetic acid  
403 (TCA) 50% for 10 min. Cells were washed with acetone twice and resuspended in 2%  
404 SDS sample buffer. Proteins were resolved by SDS-PAGE in a 7.5% acrylamide gels and  
405 transferred onto nitrocellulose membranes overnight at 30V. Rabbit anti-Caspase-1  
406 (D7F10) antibody (Cell Signaling Technology; 1:1000 dilution), mouse anti-Caspase-8  
407 (1C12) (Cell Signaling Technology; 1:1000 dilution), and mouse anti-GFP (JL8) (Living  
408 colors, 1:1000 dilution) were used as primary antibodies to detect the expression of  
409 Caspase-1, Caspase-8 and proteins fused to GFP respectively. Rabbit anti-G6PDH  
410 antibody (Sigma; 1:50000 dilution) was used as a loading control. Anti-rabbit IgG-IRDye  
411 800CW, anti-rabbit IgG-IRDye 680LT, anti-mouse IgG-IRDye 800CW, anti-mouse IG-  
412 IRDye 680LT (all from LI-COR; at 1:5000 dilution) were used as secondary antibodies.

413 Odyssey infrared imaging system (LI-COR) was used for developing the immunoblots.

414 Densitometry plots of were obtained using ImageJ and R.

#### 415 **Flow cytometry**

416 Cells were cultured as previously stated. After 5 h of galactose induction, 1 mL of cell  
417 culture was harvested and incubated at 30 °C with 5 µg/mL Rd 123 for 30 min in aerobic  
418 conditions, 2.5 µg/mL DHE for 5 min or 0.0005% PI for 2 min. Cells were analyzed using a  
419 FACScan (Becton Dickinson) flow cytometer through a 488 nm excitation laser and a  
420 525/30 BP emission filter (FL1) for Rd 123 and a 585/42 BP emission filter (FL2) for DHE  
421 and PI. At least 10,000 cells were analyzed for each experiment. Data were processed  
422 using FlowJo software (FlowJo LLC, Ashland, OR, USA).

#### 423 **Spot growth assays**

424 Spot growth assays on plates were performed by incubating transformants overnight in SR  
425 media, adjusting the culture to an OD<sub>600</sub> of 0.5 and spotting samples in four serial 10-fold  
426 dilutions onto the surface of SD or SG plates lacking the appropriate amino acids to  
427 maintain selection for plasmids, followed by incubation at 30 °C for 2-3 days.

#### 428 **Cell viability assay**

429 Cells were cultured as previously stated. After 5 h of galactose induction, cell viability was  
430 measured by the microcolonies method [33]. Cells suspensions (5 µL) at an adjusted  
431 OD<sub>600</sub> of 0.2 were poured on a thin layer of yeast peptone dextrose (YPD) agar on a  
432 microscope slide. A coverslip was placed over the samples and after 12-24 h viable and  
433 unviable cells were identified based on their ability to form microcolonies.

#### 434 **Microscopy techniques**

435 For *in vivo* bright differential interference contrast (DIC) microscopy or fluorescence  
436 microscopy, cells were cultured as previously stated, harvested by centrifugation 3000 rpm  
437 3 min and viewed directly on the microscope. Cells were examined with an Eclipse  
438 TE2000U microscope (Nikon) using the appropriate sets of filters. Digital images were  
439 acquired with Orca C4742-95-12ER charge-coupled device camera (Hamamatsu) and  
440 were processed with the HCLImage software (Hamamatsu, Japan).

441 For confocal microscopy, cells were cultured as previously stated, harvested by  
442 centrifugation, and fixed with a 4% p-formaldehyde 3.4% sucrose solution for 15 min at  
443 room temperature. Then cells were washed and resuspended in phosphate buffered saline  
444 (PBS). Coverslips were washed with ethanol, treated with poly-L-lysine 0.1% solution  
445 (Sigma) for 1 h, washed with milliQ water, and dried at room temperature. Adhesion of  
446 cells was performed by adding 200  $\mu$ L of fixed cells over poly-L-lysine treated coverslips  
447 and incubating for 1 h. Excess cells were removed by washing two times with PBS.  
448 ProLong<sup>TM</sup> Glass Antifade Mountant (ThermoFisher)/Glycerol (1:1) was used to avoid  
449 photobleaching. Cells were examined with an Olympus Ix83 inverted microscope, coupled  
450 to Olympus FV1200 confocal system, using the appropriate set of filters.

451 Observation of actin in yeast cells with rhodamine-conjugated phalloidin (Sigma) was  
452 performed as previously described [34]. For FM4-64 vital staining (*N*-[3-  
453 triethylammoniumpropyl]-4-[*p*-diethylaminophenylhexatrienyl] pyridinium dibromide;  
454 Invitrogene), cells were cultured as previously stated, harvested by centrifugation and  
455 resuspended in synthetic medium. Cells were labelled with 2.4  $\mu$ M FM4-64, incubated for  
456 1.5 h at 30 °C with shaking, washed in PBS and observed by fluorescence microscopy.  
457 Images were analyzed using Image J and Adobe Photoshop.

458 **Statistical analysis**

459 Statistical significance for experiments was tested with Student's T-test. P-values were  
460 calculated with R and the asterisks (\*, \*\*, \*\*\*) in the figures correspond to a p-value of  
461 <0.05, <0.01 and <0.001 respectively. Experiments were performed as biological triplicates  
462 on different clones and data with error bars are represented as mean  $\pm$  standard deviation.

### 463 **Acknowledgements**

464 We thank A. Sellers-Moya, D. A. Bachovchin, F. Mollinedo and M. C. Duncan for  
465 materials; and J. Kagan for materials and useful discussion; C. Mazzoni, and our  
466 colleagues at research Unit 3 for their support and discussion; and L. Sastre for technical  
467 support. M. V. was supported by a predoctoral contract from Universidad Complutense de  
468 Madrid. We thank the Genomics Unit (Genomics and Proteomics Center, UCM) for their  
469 help with the sequencing reactions, the Confocal and Multiphoton Microscopy Unit  
470 (Cytometry and Fluorescence Microscopy Center, UCM) for their help with the confocal  
471 microscopy experiments, and the Flow Cytometry Unit (Cytometry and Fluorescence  
472 Microscopy Center, UCM) for their help with the flow cytometry experiments. This research  
473 is possible thanks to funding from Grant PID2019-105342GB-I00 from Ministerio de  
474 Ciencia e Innovación (Spain).

### 475 **References**

- 476 1. Shalini, S., Dorstyn, L., Dawar, S. & Kumar, S. (2015). Old, new and emerging functions  
477 of caspases. *Cell Death Differ.* 22. 526-539.
- 478 2. Sollberger, G., Strittmatter, G. E., Garstkiewicz, M., Sand, J. & Beer, H. D. (2014).  
479 Caspase-1: the inflammasome and beyond. *Innate Immun.* 20, 115-125.
- 480 3. Sborgi, L., Ruhl, S., Mulvihill, E., Pipercevic, J., Heilig, R., Stahlberg, H, et al. GSDMD  
481 membrane pore formation constitutes the mechanism of pyroptotic cell death. *EMBO J.*  
482 2016;35:1766-78.

- 483 4. Ding, J., Wang, K., Liu, W., She, Y., Sun, Q., Shi, J., *et al.* (2016). Pore-forming activity  
484 and structural autoinhibition of the gasdermin family. *Nature* 535, 111-116.
- 485 5. Tummers, B. & Green, D. R. (2017). Caspase-8: regulating life and death. *Immunol.*  
486 *Rev.* 277, 76-89.
- 487 6. Ramirez, M. L.G. & Salvesen, G. S. (2018). A primer on caspase mechanisms. *Semin.*  
488 *Cell. Dev. Biol.* 82, 79-85.
- 489 7. Kagan, J. C., Magupalli, V. G. & Wu, H. (2014). SMOCs: supramolecular organizing  
490 centres that control innate immunity. *Nat. Rev. Immunol.* 14, 821-826.
- 491 8. Nanson, J. D., Kobe, B. & Ve, T. (2019). Death, TIR, and RHIM: Self-assembling  
492 domains involved in innate immunity and cell-death signaling. *J. Leukoc. Biol.* 105, 363-  
493 375.
- 494 9. Chang, D. W., Xing, Z., Capacio, V. L., Peter, M. E. & Yang, X. (2003). Interdimer  
495 processing mechanism of procaspase-8 activation. *EMBO J.* 22, 4132-4142.
- 496 10. Boucher, D., Monteleone, M., Coll, R. C., Chen, K. W., Ross, C. M., Teo, J. L., *et al.*  
497 (2018). Caspase-1 self-cleavage is an intrinsic mechanism to terminate inflammasome  
498 activity. *J. Exp. Med.* 215, 827-840.
- 499 11. Julien, O. & Wells, J. A. (2017). Caspases and their substrates. *Cell Death Differ.* 24,  
500 1380-1389.
- 501 12. Timmer, J. C. & Salvesen, G. S. (2007). Caspase substrates. *Cell Death Differ.* 14, 66-  
502 72.
- 503 13. Wang, K., Sun, Q., Zhong, X., Zeng, M., Zeng, H., Shi, X., *et al.* (2020). Structural  
504 mechanism for GSDMD targeting by autoprocessed caspases in pyroptosis. *Cell* 180, 941-  
505 955.

- 506 14. Laurent, J.M., Young, J. H., Kachroo, A. H. & Marcotte, E. M. (2016). Efforts to make  
507 and apply humanized yeast. *Brief Funct. Genomics* 15, 155-163.
- 508 15. Srinivasula, S. M., Ahmad, M., MacFarlane, M., Luo, Z. W., Huang, Z. W., Fernandes-  
509 Alnemri, T., *et al.* (1998). Generation of constitutively active recombinant caspases-3 and -  
510 6 by rearrangement of their subunits. *J. Biol. Chem.* 273, 10107-10111.
- 511 16. Kang, J. J., Schaber, M. D., Srinivasula, S. M., Alnemri, E. S., Litwack, G., Hall, D. J.,  
512 *et al.* (1999). Cascades of mammalian caspase activation in the yeast *Saccharomyces*  
513 *cerevisiae*. *J. Biol. Chem.* 274, 3189-3198.
- 514 17. Wright, M. E., Han, D. K., Carter, L., Fields, S., Schwartz, S. M. & Hockenbery, D. M.  
515 (1999). Caspase-3 inhibits growth in *Saccharomyces cerevisiae* without causing cell  
516 death. *FEBS Lett.* 446, 9-14.
- 517 18. Puryer, M. A. & Hawkins, C. J. (2006) Human, insect and nematode caspases kill  
518 *Saccharomyces cerevisiae* independently of YCA1 and Aif1p. *Apoptosis* 11, 509-517.
- 519 19. Lisa-Santamaría, P., Neiman, A. M., Cuesta-Marbán, A., Mollinedo, F., Revuelta, J. L.  
520 & Jiménez, A. (2009). Human initiator caspases trigger apoptotic and autophagic  
521 phenotypes in *Saccharomyces cerevisiae*. *Biochim. Biophys. Acta* 1793, 561-571.
- 522 20. Martínón, F., Mayor, A. & Tschopp, J. (2009). The inflammasomes: guardians of the  
523 body. *Annu. Rev. Immunol.* 27, 229-265.
- 524 21. Bao, Q. & Shi, Y. (2007). Apoptosome: a platform for the activation of initiator  
525 caspases. *Cell Death Differ.* 14, 56-65.
- 526 22. Ball, D. P., Taabazuing, C. Y., Griswold, A. R., Orth, E. L., Rao, S. D., Kotliar, I. B., *et*  
527 *al.* (2020). Caspase-1 interdomain linker cleavage is required for pyroptosis. *Life Sci.*  
528 *Alliance* 3, Article e202000664.

- 529 23. Bircham, P. W., Papagiannidis, D., Lüchtenborg, C., Ruffini, G., Brügger, B. & Schuck,  
530 S. (2020). Control of endoplasmic reticulum membrane biogenesis by regulators of lipid  
531 metabolism. *BioRxive* doi: <https://doi.org/10.1101/2020.02.23.961722>.
- 532 24. Evangelista, M., Zigmond, S. & Boone, C. (2003). Formins: signaling effectors for  
533 assembly and polarization of actin filaments. *J. Cell Sci.* 116, 2603-2611.
- 534 25. Pruyne, D., Evangelista, M., Yang, C., Bi, E., Zigmond, S., Bretscher, A., *et al.* (2002),  
535 Role of formins in actin assembly: nucleation and barbed-end association. *Science* 297,  
536 612-615.
- 537 26. Juanes, M. A. & Piatti, S. (2016). The final cut: cell polarity meets cytokinesis at the  
538 bud neck in *S. cerevisiae*. *Cell Mol. Life Sci.* 73, 3115-3136.
- 539 27. Escalante-Chong, R., Savir, Y., Carroll, S. M., Ingraham, J. B., Wang, J., Marx, C. J.,  
540 *et al.* (2015). Galactose metabolic genes in yeast respond to a ratio of galactose and  
541 glucose. *Proc. Natl. Acad. Sci. U S A.* 112, 1636-1641.
- 542 28. Boatright, K. M. & Salvesen, G. S. (2003). Mechanisms of caspase activation. *Curr.*  
543 *Opin. Cell Biol.* 15, 725-731.
- 544 29. Srinivasula, S. M., Poyet, J. L., Razmara, M., Datta, P., Zhang, Z. & Alnemri, E. S.  
545 (2002). The PYRIN-CARD protein ASC is an activating adaptor for caspase-1. *J. Biol.*  
546 *Chem.* 277, 21119-21122.
- 547 30. Aoh, Q. L., Graves, L. M. & Duncan, M. C. (2011). Glucose regulates clathrin adaptors  
548 at the trans-Golgi network and endosomes. *Mol. Biol. Cell.* 22, 3671-3683.
- 549 31. Alberti, S., Gitler, A. D. & Lindquist, S. (2007). A suite of Gateway cloning vectors for  
550 high-throughput genetic analysis in *Saccharomyces cerevisiae*. *Yeast* 24, 913-919.

- 551 32. Fernández-Acero, T., Bertalmio, E., Luna, S., Mingo, J., Bravo-Plaza, I., Rodríguez-  
552 Escudero, I., *et al.* (2019). Expression of human PTEN-L in a yeast heterologous model  
553 unveils specific N-terminal motifs controlling PTEN-L subcellular localization and function.  
554 *Cells* 8. Article 1512.
- 555 33. Palermo, V., Falcone, C. & Mazzoni, C. (2007). Apoptosis and aging in mitochondrial  
556 morphology mutants of *S. cerevisiae*. *Folia Microbiol* (Praha). 52, 479-483.
- 557 34. Jiménez, J., Cid, V. J., Cenamor, R., Yuste, M., Molero, G., Nombela, C., *et al.* (1998).  
558 Morphogenesis beyond cytokinetic arrest in *Saccharomyces cerevisiae*. *J. Cell Biol.* 143,  
559 1617-1634.

560

## 561 **Figure captions**

562 **Figure 1.** Heterologous expression of human Caspase-1 and Caspase-8 inhibits *S.*  
563 *cerevisiae* cell growth. (a) Schematic representation of Caspase-1 and 8 depicting their  
564 respective DDs (green), long (red), and short (blue) catalytic subunits. Their potential  
565 cleavage products and their size, the autocleavage aspartic residues (D), and the cysteine  
566 residue at the catalytic center (C) are also indicated. (b) Spot growth of BY4741 strain  
567 bearing pAG413-Caspase-1 and pAG413-Caspase-8. pAG413 empty vector ( $\emptyset$ ) was used  
568 as a negative control. Cells were cultured on SD (Glucose) and SG (Galactose) agar  
569 media for repression and induction of Caspase-1 and Caspase-8 expression, respectively.  
570 A representative assay from three different experiments with different transformant clones  
571 is shown. (c) Growth curves of cells bearing the same plasmids as in (b) performed in SG  
572 medium. Measures of OD<sub>600</sub> were taken each two hours throughout the exponential growth  
573 phase. Results are represented as OD<sub>600</sub> vs time in a semilogarithmic plot (left panel).  
574 Doubling times were determined by calculating the slope over the linear portion of the



575 growth curve (right panel). Results correspond to the mean of three biological replicates  
576 performed on different transformants. Error bars represent SD. Asterisks (\*, \*\*, \*\*\*) indicate  
577 a p-value <0.05, 0.01, and 0.01 by the Student's T-test. (d) Immunoblots showing the  
578 expression of Caspase-1 (upper panel) and Caspase-8 (lower panel) in yeast lysates of  
579 cells bearing the same plasmids as in (b) after 5 h induction in SG medium. Membranes  
580 were hybridized with anti-Caspase-1 and anti-Caspase-8 antibodies. Anti-G6PDH antibody  
581 was used as loading control. A representative blot from three different experiments with  
582 different transformants is shown.

583

584 **Figure 2.** Caspase-1 and Caspase-8 toxicity is a consequence of their proteolytic activity.  
585 (a) Yeast spot assay performed as in Fig. 1(b) but using BY4741 strain bearing pAG413-  
586 Caspase-1, pAG413-Caspase-8, or plasmids bearing their respective catalytically inactive  
587 mutants pAG413-Caspase-1 C285A and pAG413-Caspase-8 C360A, and the uncleavable  
588 mutant pAG413-Caspase-1 D5N. (b) Immunoblots showing the expression in yeast lysates  
589 of cells bearing the same plasmids as in (a) after 5 h of induction in SG medium.  
590 Membranes were hybridized with anti-Caspase-1, and anti-Caspase-8 antibodies. Anti-  
591 G6PDH antibody was used as a loading control. Representative assays from three  
592 different experiments with distinct transformants are shown in all cases.

593

594 **Figure 3.** Caspase-1 and Caspase-8 cause mitochondrial membrane depolarization, ROS  
595 production, reduction in cell viability, and cell death. (a) Stacked histograms (n=10,000)  
596 showing DHE, Rd123 and PI fluorescent signal by flow cytometry respectively in abscissae  
597 (upper panel) and graph showing the percentage of positive DHE, Rd 123 and PI stained  
598 cells of each population (lower panel) of BY4741 strain bearing the same plasmids as in

599 Fig. 1(b) after 5 h of induction in SG medium. (b) Graph showing the percentage of viable  
600 cells determined by a cell viability assay of BY4741 strain bearing the same plasmids as in  
601 (a). Results correspond to the mean of three biological replicates performed on different  
602 clones in all cases. Error bars represent SD. Asterisks (\*, \*\*, \*\*\*) indicate a p-value <0.05,  
603 <0.01 and <0.001 respectively by the Student's T-test.

604

605 **Figure 4.** Caspase-1 and Caspase-8 overexpression alters subcellular organelles. (a)  
606 Confocal fluorescent microscopy of BY4741 *trp1Δ* strain bearing the mitochondrial marker  
607 pYEp-lac112-Ilv6-Cherry and the same plasmids as in Fig. 1(b). (b) Fluorescent and bright  
608 field differential interferential contrast (DIC) microscopy (left panel) and quantification of  
609 the number of TGN spots per cell (right panel) of DLY35 strain, bearing the TGN marker  
610 Sec7-GFP, and the same plasmids as in Fig. 1(b). (c) Fluorescent and bright field (DIC)  
611 microscopy (left panel) and boxplot of the vacuolar diameter ( $\mu\text{m}$ ) (right panel) of MVY04  
612 strain, bearing the vacuolar marker Vph1-GFP, and the same plasmids as in Fig. 1(b). (d)  
613 Fluorescent and bright field (DIC) microscopy (left panel) and quantification of the  
614 percentage of cells showing expanded ER (right panel) of BY4741 strain bearing the ER  
615 marker pRS425-Sec63-mRFP and the same plasmids as in Fig. 1(b). Abnormal ER  
616 expansions were considered following previously described criteria [23]. Caspase-1 and  
617 Caspase-8 expression were induced in SG medium for 5 h in all cases. All scale bars  
618 indicate 5  $\mu\text{m}$ . Results in (b), (c), and (d) correspond to the mean of three biological  
619 replicates performed on different transformants. Error bars represent SD. Asterisks (\*, \*\*,  
620 \*\*\*) indicate a p-value <0.05, 0.01, and 0.001 respectively by the Student's T-test.

621

622 **Figure 5.** Caspase-1 and Caspase-8 overexpression alters actin cytoskeleton via Bni1  
623 proteolysis. (a) Acting staining with rhodamine-phalloidin and bright field (DIC) microscopy  
624 of BY4741 wild type, and isogenic *bni1Δ* and *bnr1Δ* strains bearing the same plasmids as  
625 in Fig. 1(b). Scale bar indicates 5 μm. A representative image from three different  
626 experiments with distinct transformants is shown. (b) Immunoblots showing the  
627 degradation of Bni1-GFP and the expression of Caspase-1 and Caspase-8 in yeast  
628 lysates of BY4741 *Bni1-GFP-HIS2MX6* strain bearing pAG416-Caspase-1 and pAG416-  
629 Caspase-8. pAG416 empty vector (∅) was used as a negative control. Membranes were  
630 hybridized with anti-GFP, anti-Caspase-1, and anti-Caspase-8 antibodies. Anti-G6PDH  
631 antibody was used as a loading control. Caspase-1 and Caspase-8 expression was  
632 induced in SG medium for 5 h in all cases. A representative blot from three different  
633 experiments with distinct transformants is shown.

634

635 **Figure 6.** The modulation of Caspase-1 expression, but not of Caspase-8, under the *GAL1*  
636 promoter limits its auto-processing and toxicity. (a) Immunoblot showing the expression of  
637 Caspase-1 in yeast lysates of BY4741 strain bearing pAG413-Caspase-1. Cells were  
638 cultured in synthetic media containing the indicated Gal/Glu ratios with a final  
639 concentration of sugars of 2% for 5 h. Cells cultured in SD medium were used as a  
640 negative control of expression and cells cultured in SG media as a positive control.  
641 Membrane was hybridized with anti-Caspase-1 antibody. Anti-G6PDH antibody was used  
642 as a loading control. A representative assay from two different experiments with distinct  
643 transformants is shown. (b) Spot growth assay performed with the same strain and the  
644 same ratios of galactose/glucose as in (a), but in solid media. Cells bearing pAG413 empty  
645 plasmid were used as growth control. A representative assay from three different  
646 experiments with distinct transformants is shown. (c) Measurement of OD<sub>600</sub> after 24 h of

647 incubation in media containing a R(Gal/Glu)=5.5 and R(Gal/Glu)=8.5 of BY4741 strain  
648 bearing either pAG413-Caspase-1 or the pAG13 empty plasmid as growth control. As in  
649 (b), cells cultured in SD medium were used as a negative control of expression, and cells  
650 cultured in SG media as a positive control of expression. Results correspond to the mean  
651 of three biological replicates performed on different transformants. Error bars represent  
652 SD. Asterisks (\*\*, \*\*\*) indicate a p-value <0.01, and 0.001 respectively by the Student's T-  
653 test. (d) Immunoblotting performed as in (a) but with BY4741 strain bearing pAG413-  
654 Caspase-8. Membrane was hybridized with anti-Caspase-8 antibody. Anti-G6PDH  
655 antibody was used as a loading control. A representative assay from two different  
656 experiments with different transformants is shown.

657

658 **Figure 7.** CARD and DED domains have opposite effects on the respective caspase  
659 activity. (a) Spot growth assay of BY4741 strain bearing pAG413-Caspase-1 and pAG413-  
660 Caspase-8, the plasmids with their respective catalytically inactive mutants pAG413-  
661 Caspase-1 C285A and pAG413-Caspase-8 C360A, and the plasmids with their respective  
662 mutant lacking of DD pAG413-Caspase-1  $\Delta$ CARD and pAG413-Caspase-8  $\Delta$ DED.  
663 pAG413 empty vector was used as a negative control. Cells were cultured on SD  
664 (Glucose) or SG (Galactose) agar media for induction of Caspase-1 and Caspase-8  
665 expression. A representative assay from two different experiments with different  
666 transformants is shown. (b) Graph showing the percentage of positive PI stained cells of  
667 each population of BY4741 strain bearing the same plasmids as in (a) after 5 h of  
668 induction in SG medium. Results correspond to the mean of three biological replicates  
669 performed on different transformants. Error bars represent SD. Asterisks (\*\*, \*\*\*) indicate a  
670 p-value <0.01, and 0.001 respectively by the Student's T-test. (c) Immunoblots showing  
671 the expression of wild-type and the different mutants of Caspase-1 (left panel) and

672 Caspase-8 (right panel) in yeast lysates of the cells bearing the same plasmids as in (a)  
673 after 5 h induction in SG medium. Membranes were hybridized with anti-Caspase-1 and  
674 anti-Caspase-8 antibodies. Anti-G6PDH antibody was used as a loading control. A  
675 representative assay from two different experiments with different transformants is  
676 displayed.

677

678 **Figure 8.** The modulation of Caspase-1  $\Delta$ CARD and Caspase-8  $\Delta$ DED expression under  
679 the *GAL1* promoter confirms their opposite effect on caspase activity. (a) Spot growth  
680 assay carried out as in Fig. 6(b) but with BY4741 strain bearing pAG413-Caspase-1 and  
681 pAG413-Caspase-8, or plasmids with their respective mutant lacking DD pAG413-  
682 Caspase-1  $\Delta$ CARD and pAG413-Caspase-8  $\Delta$ DED. pAG413 empty vector was used as a  
683 negative control. A representative assay from three different experiments with distinct  
684 transformants is shown. (b) Immunoblotting carried out as in Fig. 6(a) but with BY4741  
685 strain bearing pAG413-Caspase-1  $\Delta$ CARD (upper panel) and pAG413-Caspase-8  $\Delta$ DED  
686 (lower panel). Membranes were hybridized with anti-Caspase-1 and anti-Caspase-8  
687 antibody. Anti-G6PDH antibody was used as a loading control. A representative assay  
688 from two different experiments with different transformants is shown.

689

690 **Table 1.** Oligonucleotides used in this work

| Name           | Sequence                                                    |
|----------------|-------------------------------------------------------------|
| CASP1_Fw       | 5'-GGGGACAAGTTTGTACAAAAAAGCAGGCTTCACCATGGCCGACAAGGTCCTG-3'  |
| CASP1(CARD)_Fw | 5'- GGGGACAAGTTTGTACAAAAAAGCAGGCTTCACCATGAACCCAGCTATGCCAC3' |
| CASP1_Rv       | 5'- GGGACCACTTTGTACAAGAAAGCTGGGTTTTAATGTCCTGGGAAGAGGTAG-3'  |

|                 |                                                                 |
|-----------------|-----------------------------------------------------------------|
| CASP8_Fw        | 5'-GGGGACAAGTTTGTACAAAAAAGCAGGCTTCACCATGGACTTCAGCAGAAATC-3'     |
| CASP8(DED)_Fw   | 5'- GGGGACAAGTTTGTACAAAAAAGCAGGCTTCACCATGAGTGAATCACAGACTTTGG-3' |
| CASP8_Rv        | 5'GGGGACCACTTTGTACAAGAAAGCTGGGTTTTAATCAGAAGGGAAGACAAG-3'        |
| CASP1(C285A)_Fw | 5'-CATCCAGGCCGCCCGTGGTGACAGCCCTG-3'                             |
| CASP1(C285A)_Rv | 5'-CTGTCACCACGGGCGGCCTGGATGATGATCAC-3'                          |
| CASP8(C360A)_Fw | 5'-GTGTTTTTTTATTCAGGCTGCTCAGGGGGATAACTACCAG-3'                  |
| CASP8(C360A)_Rv | 5'-GTAGTTATCCCCCTGAGCAGCCTGAATAAAAAACACTTTGG-3'                 |

691



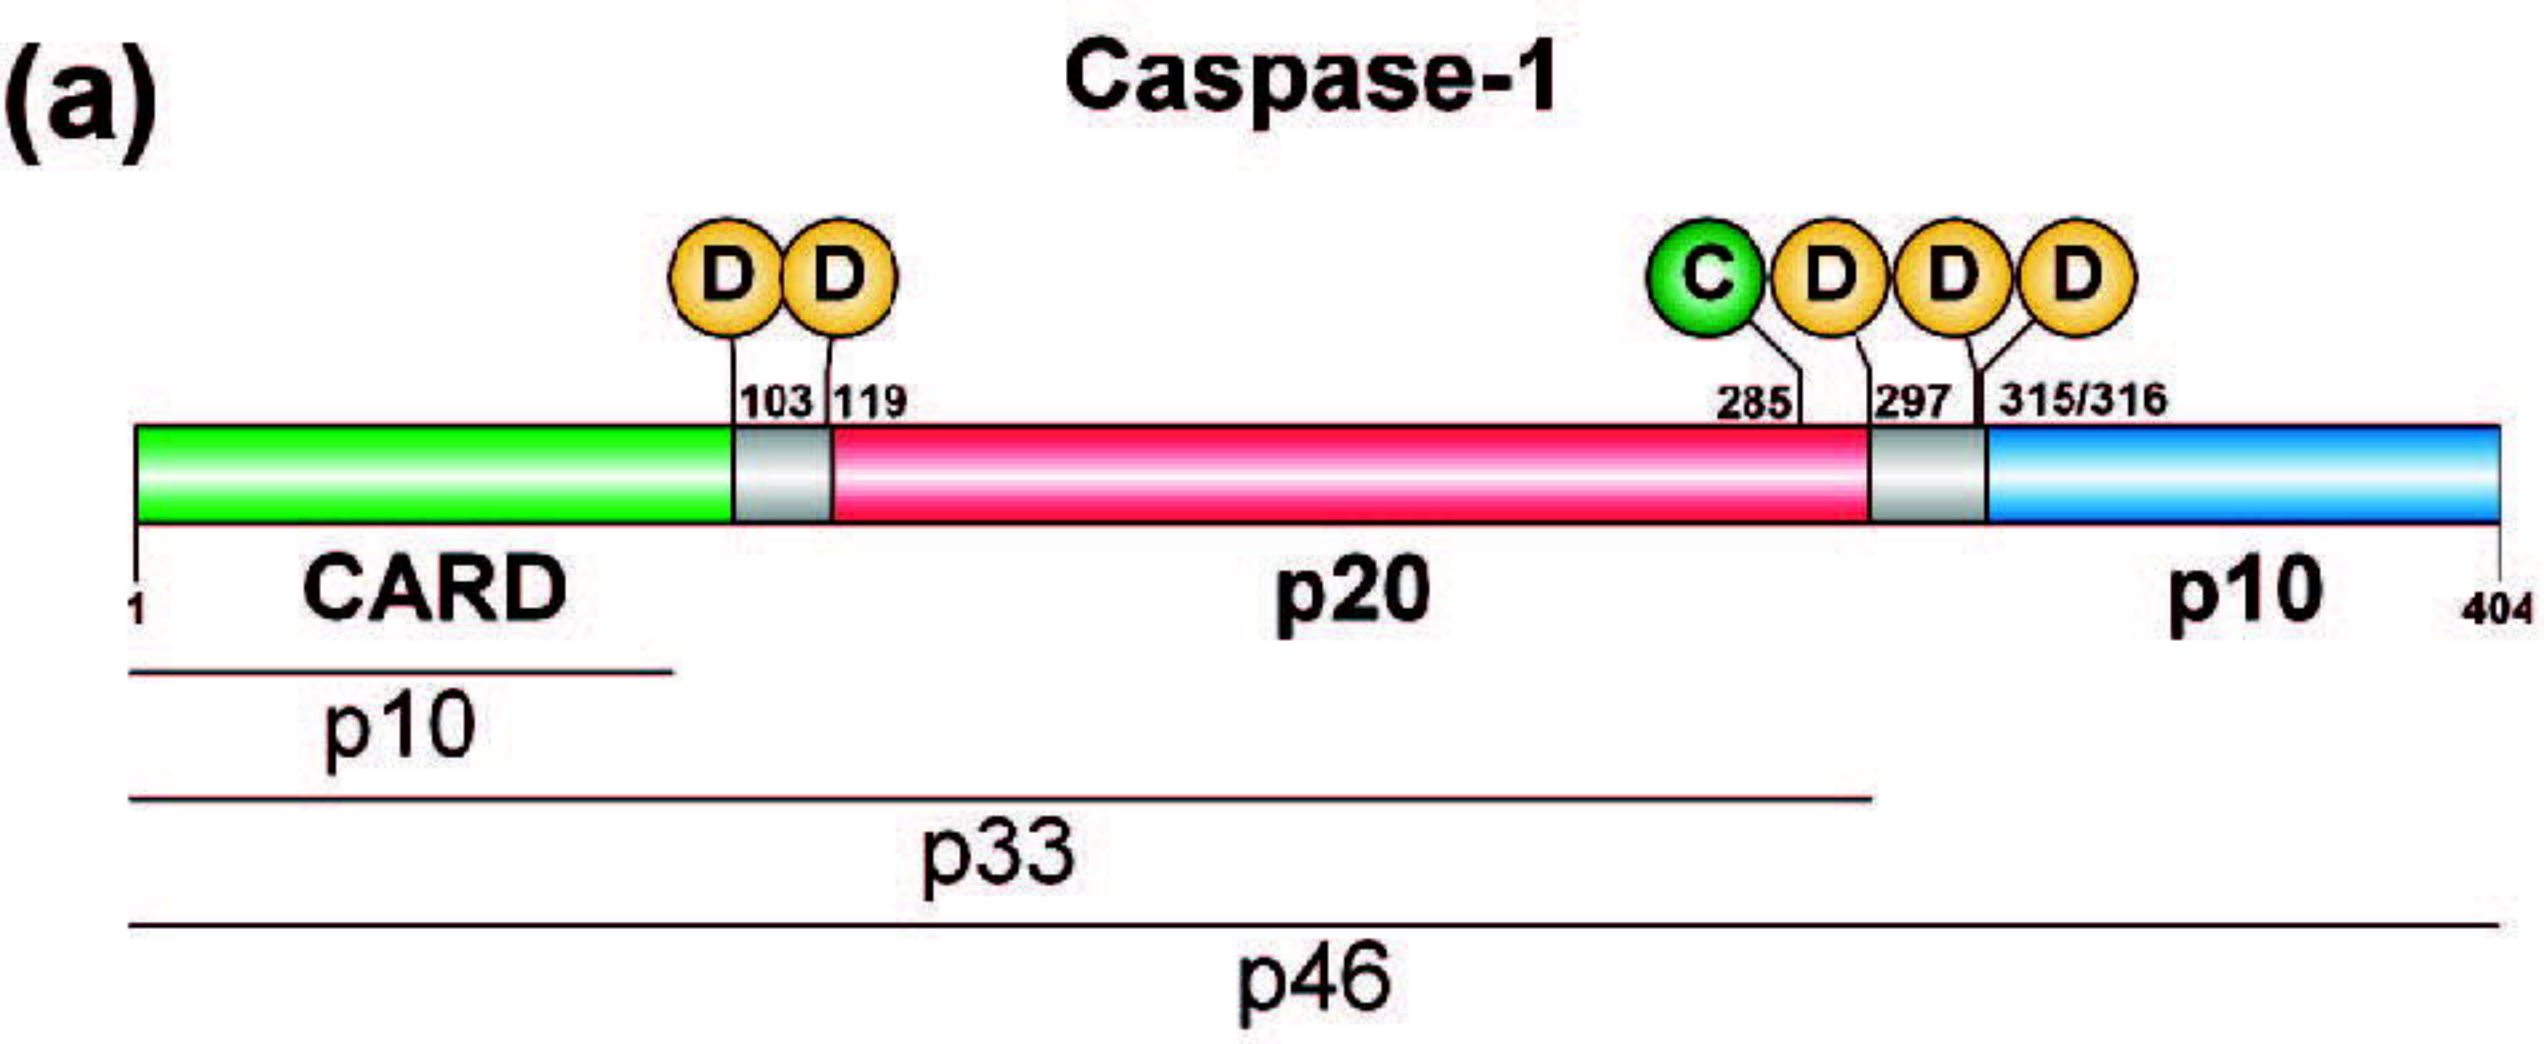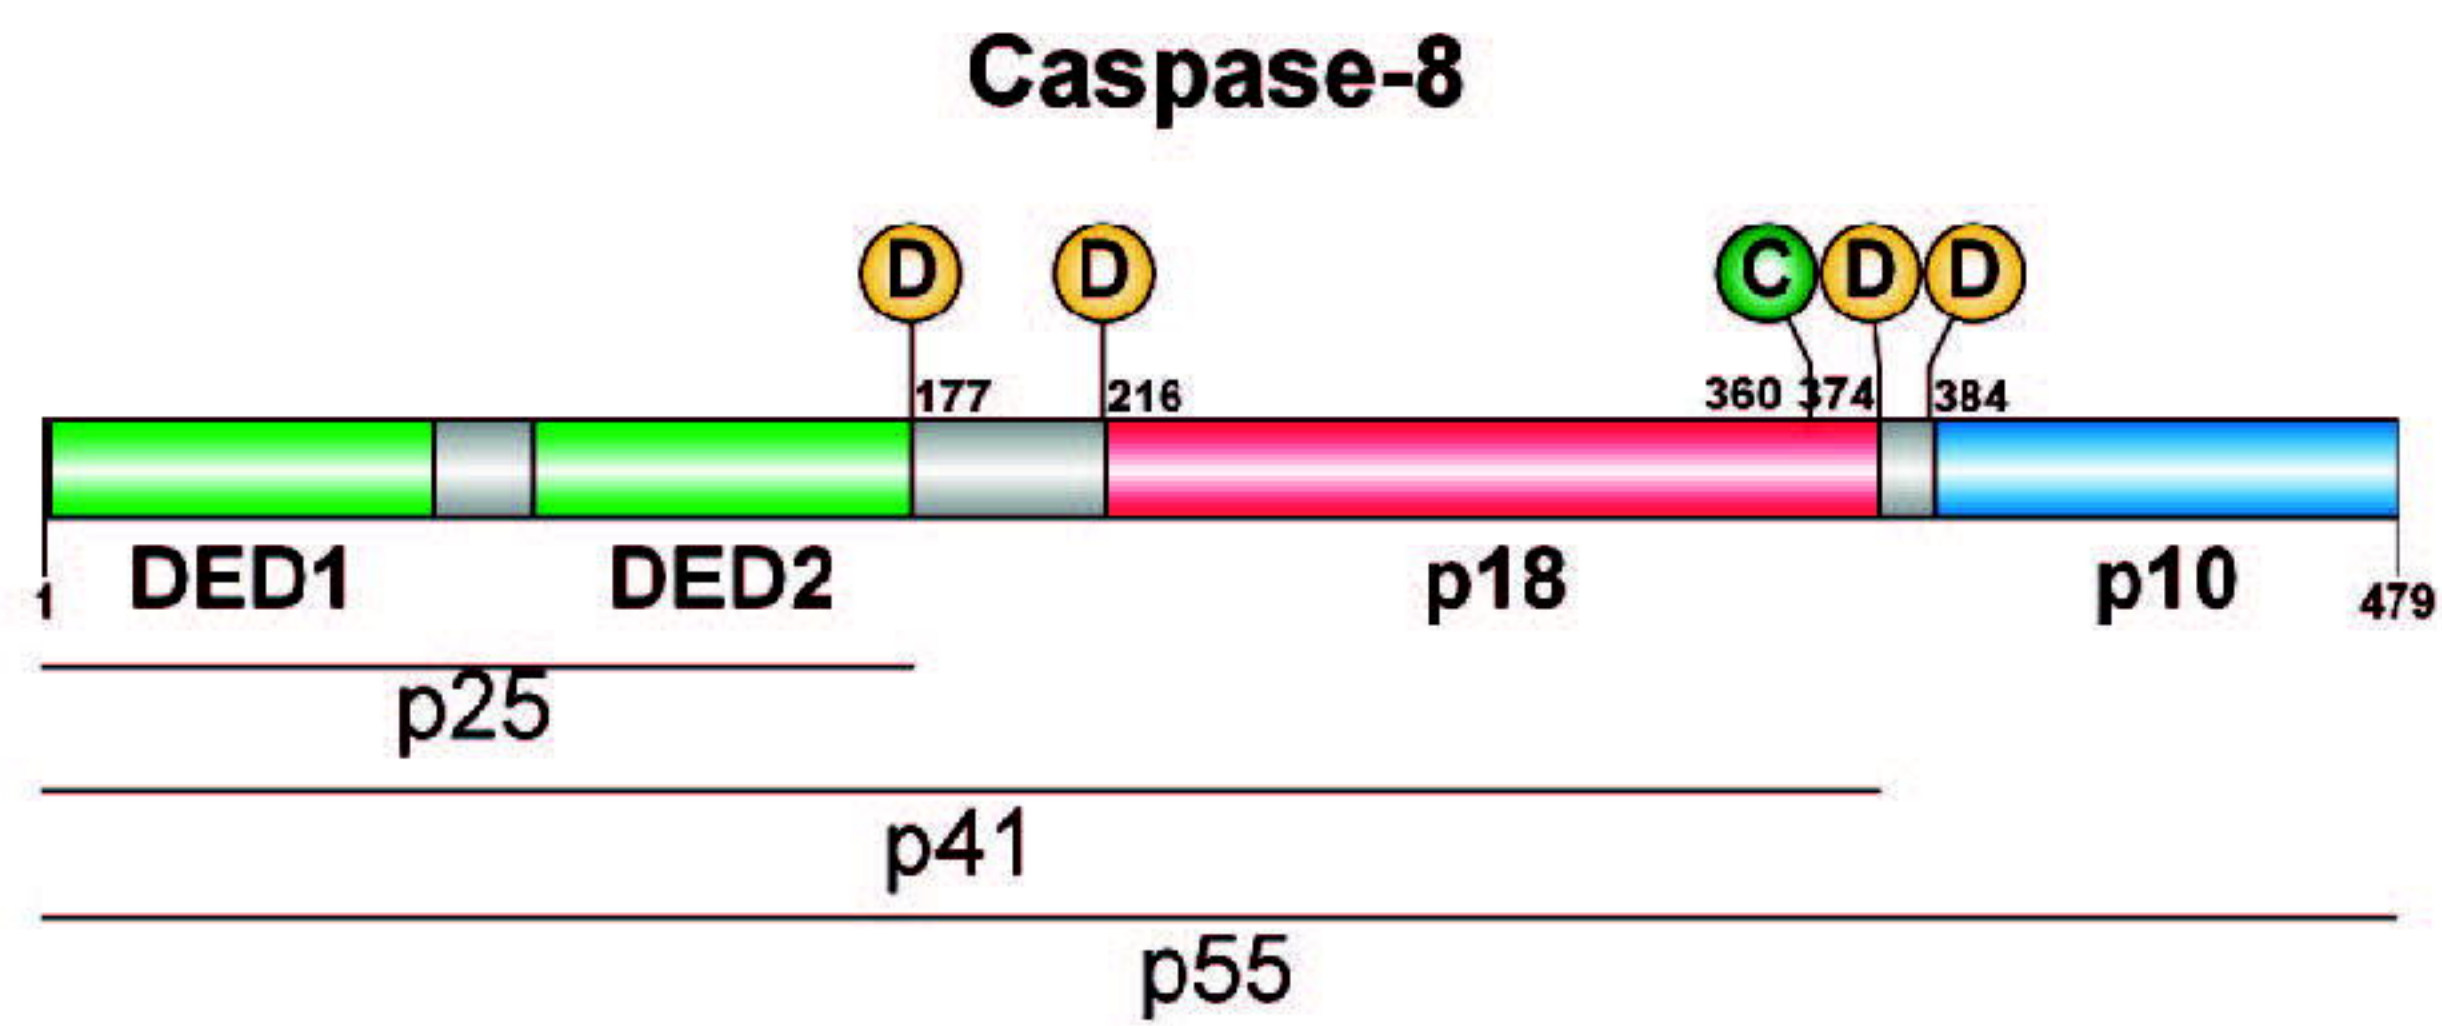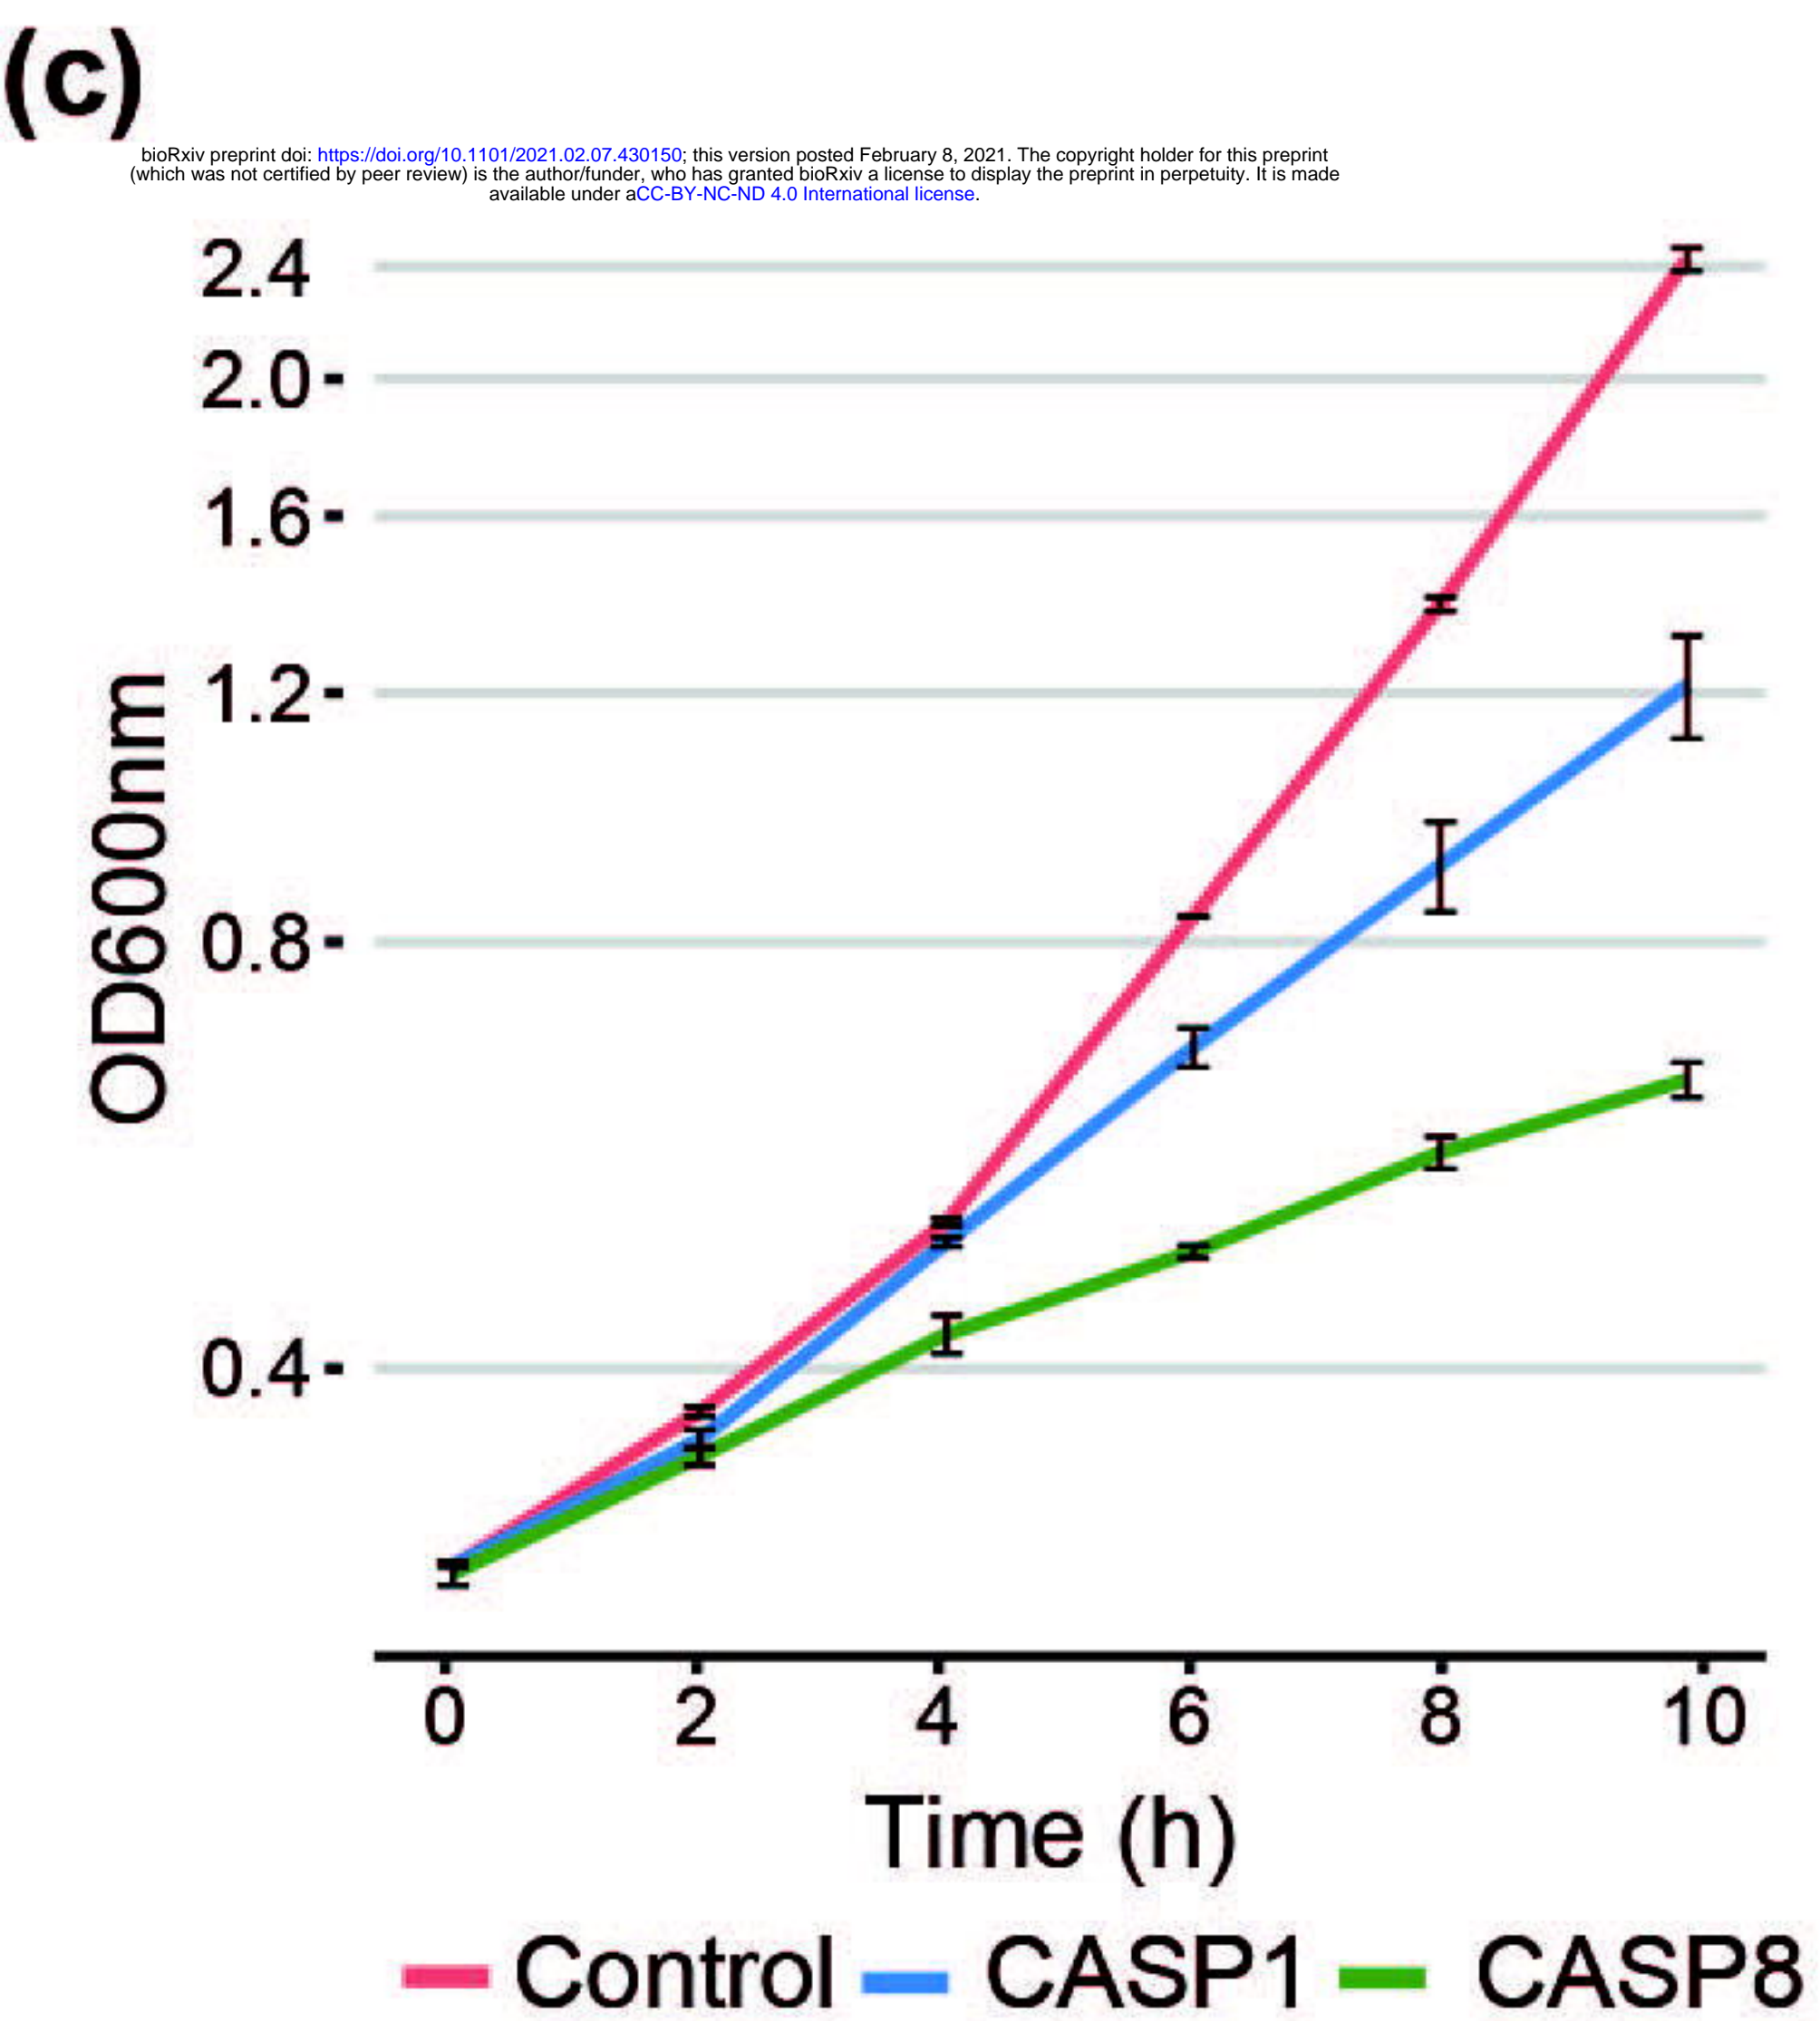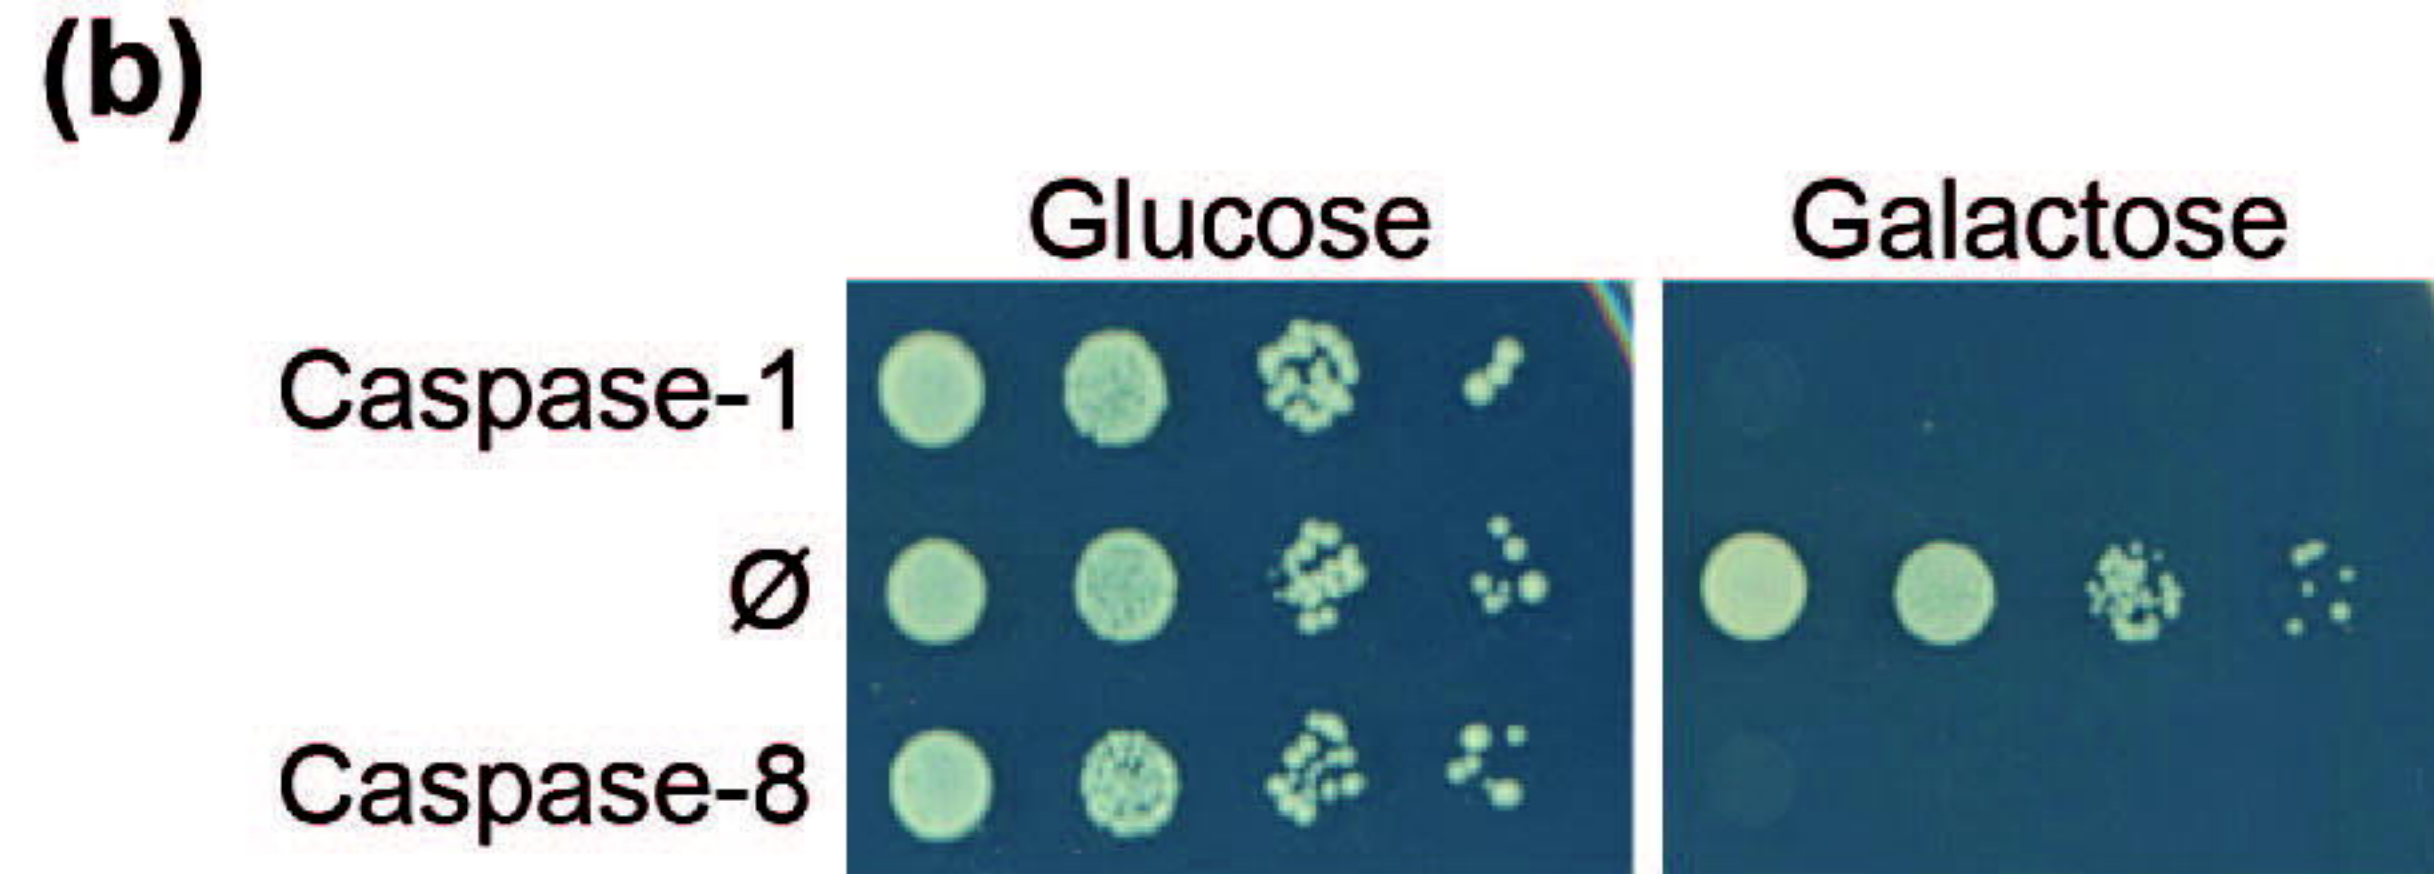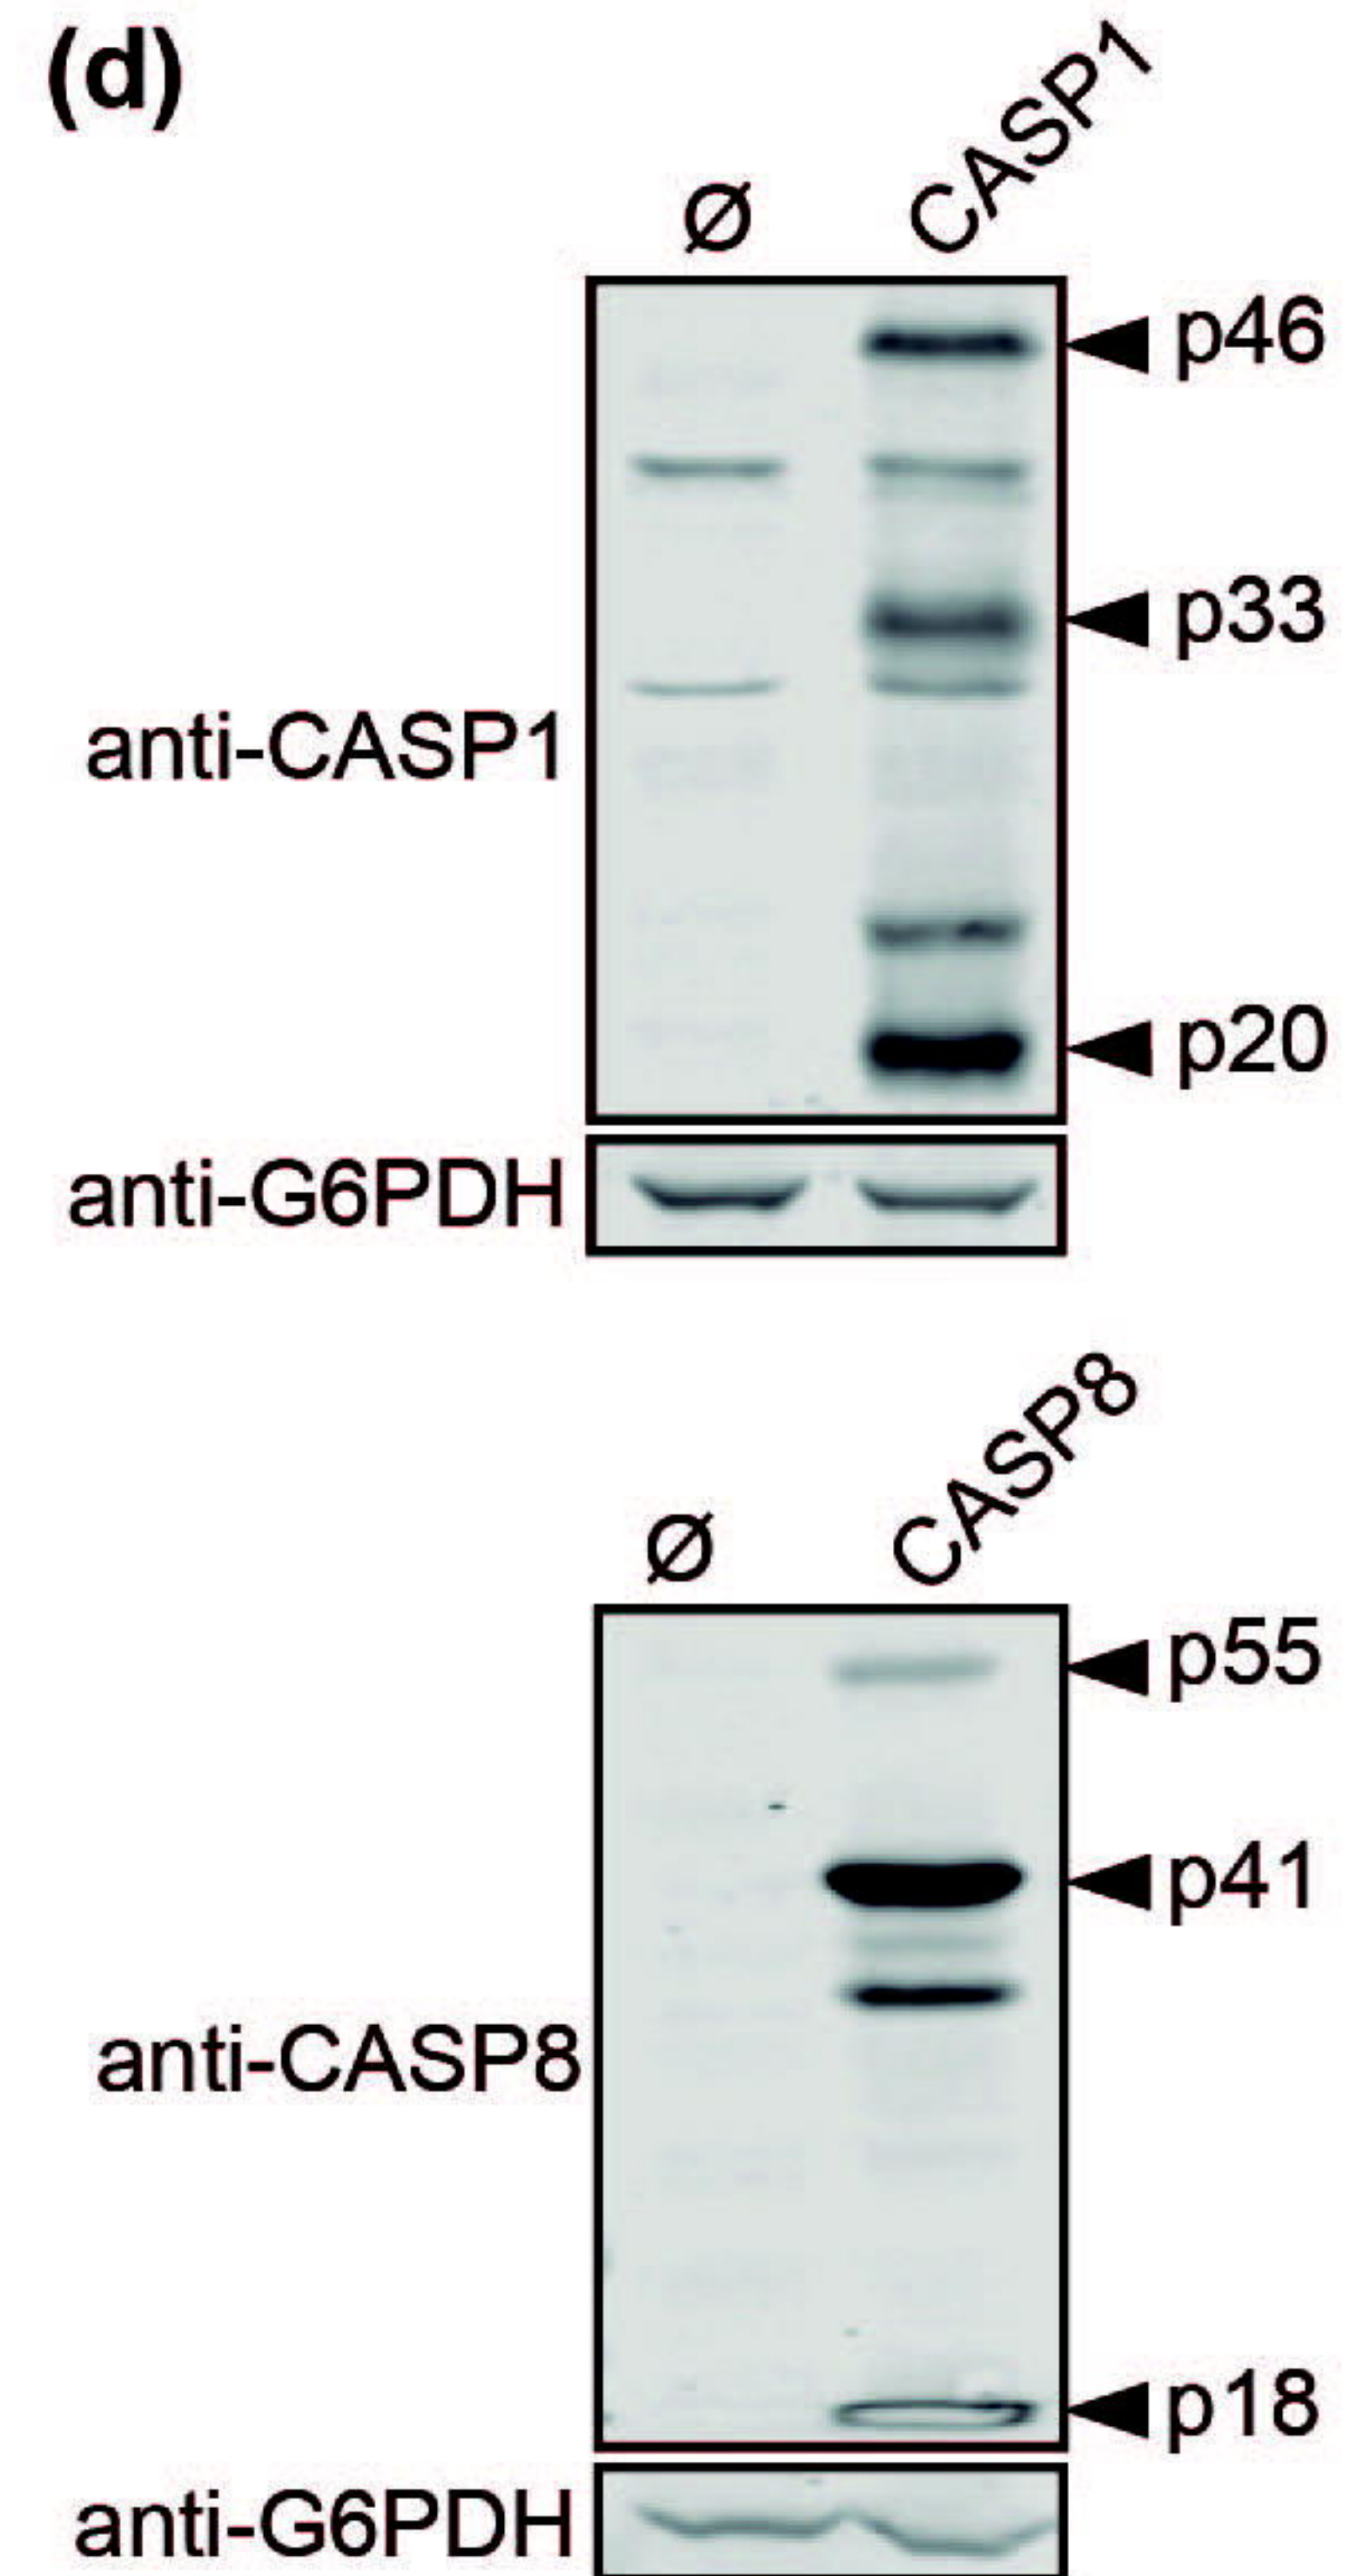



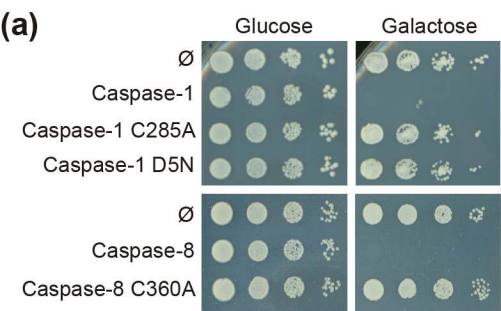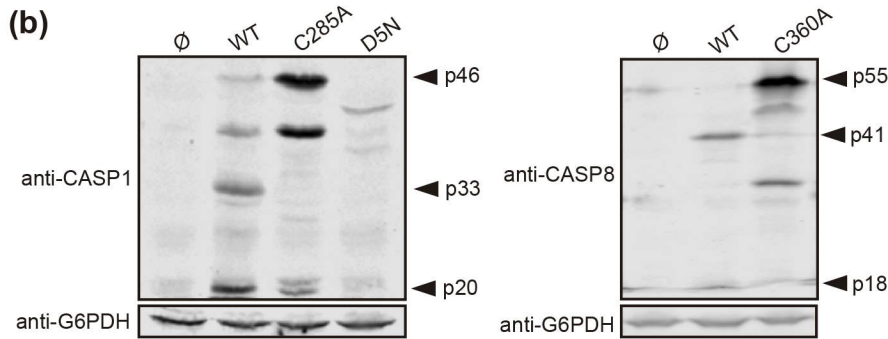



**(a)**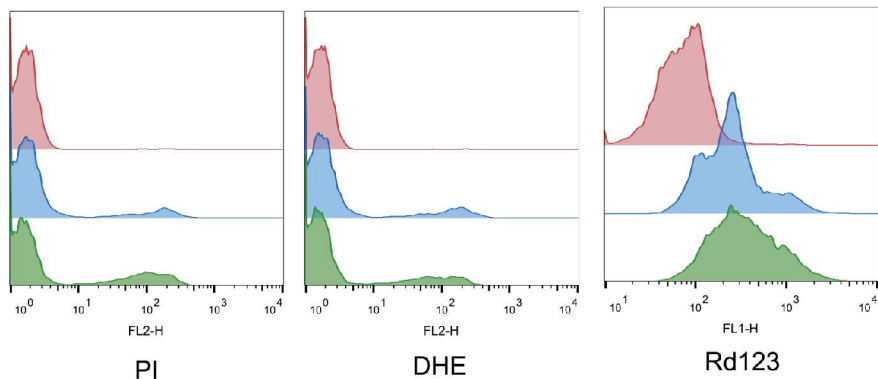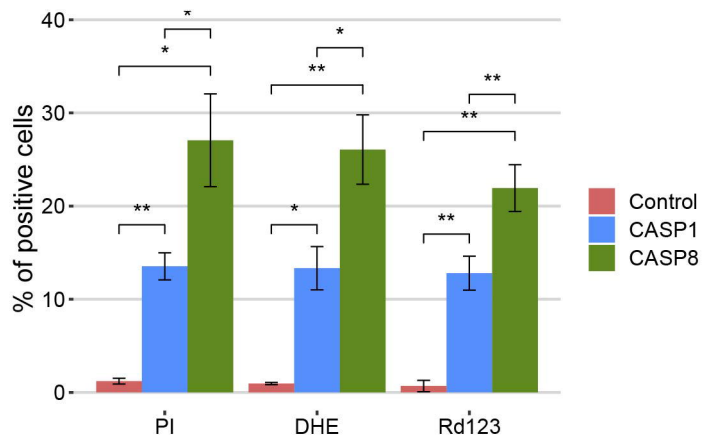**(b)**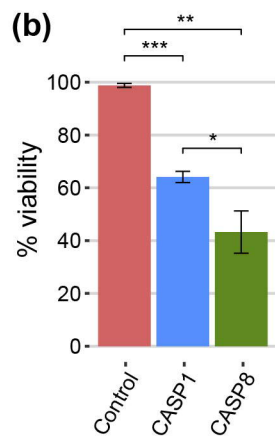

**(a)**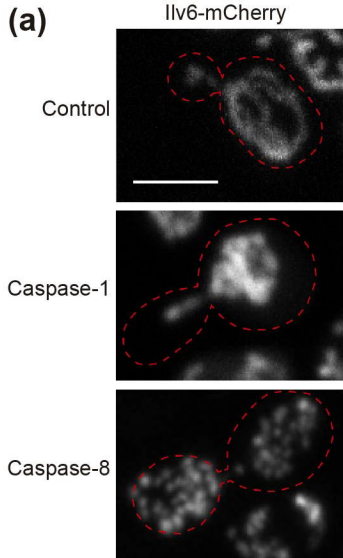**(b)**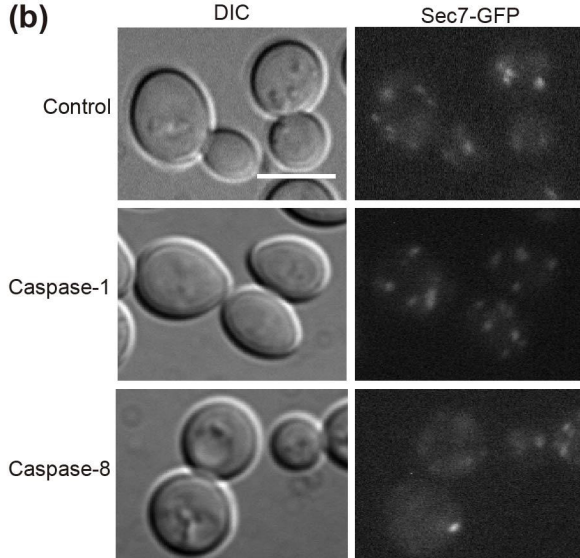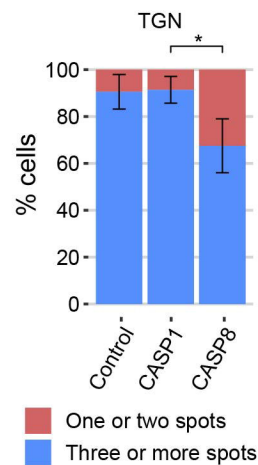**(c)**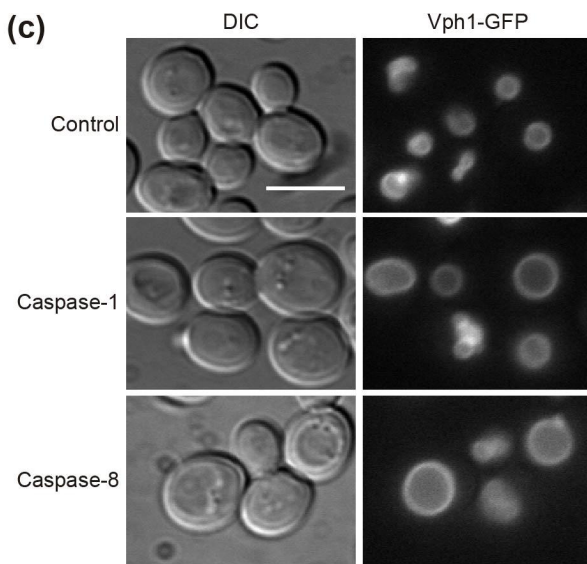**(d)**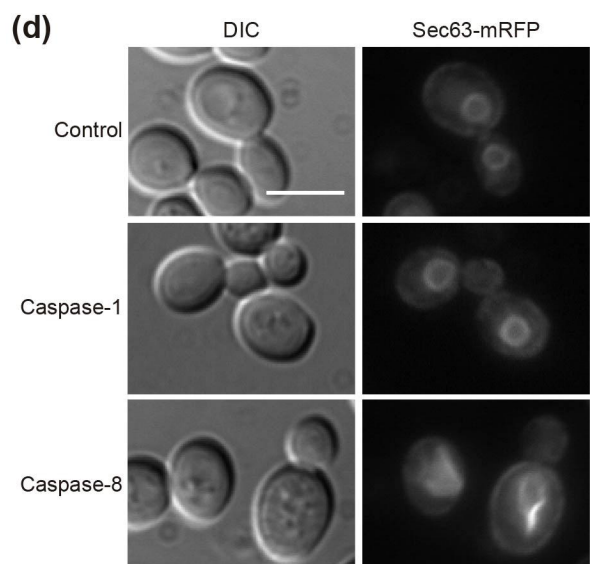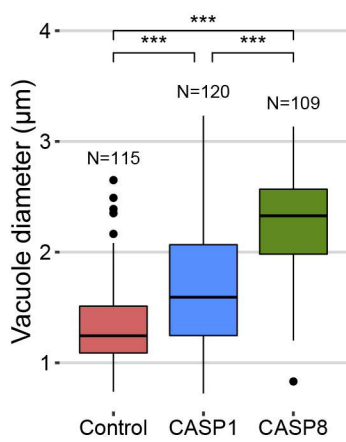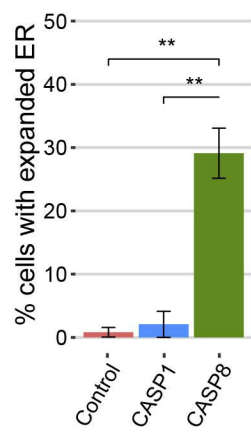

**(a)**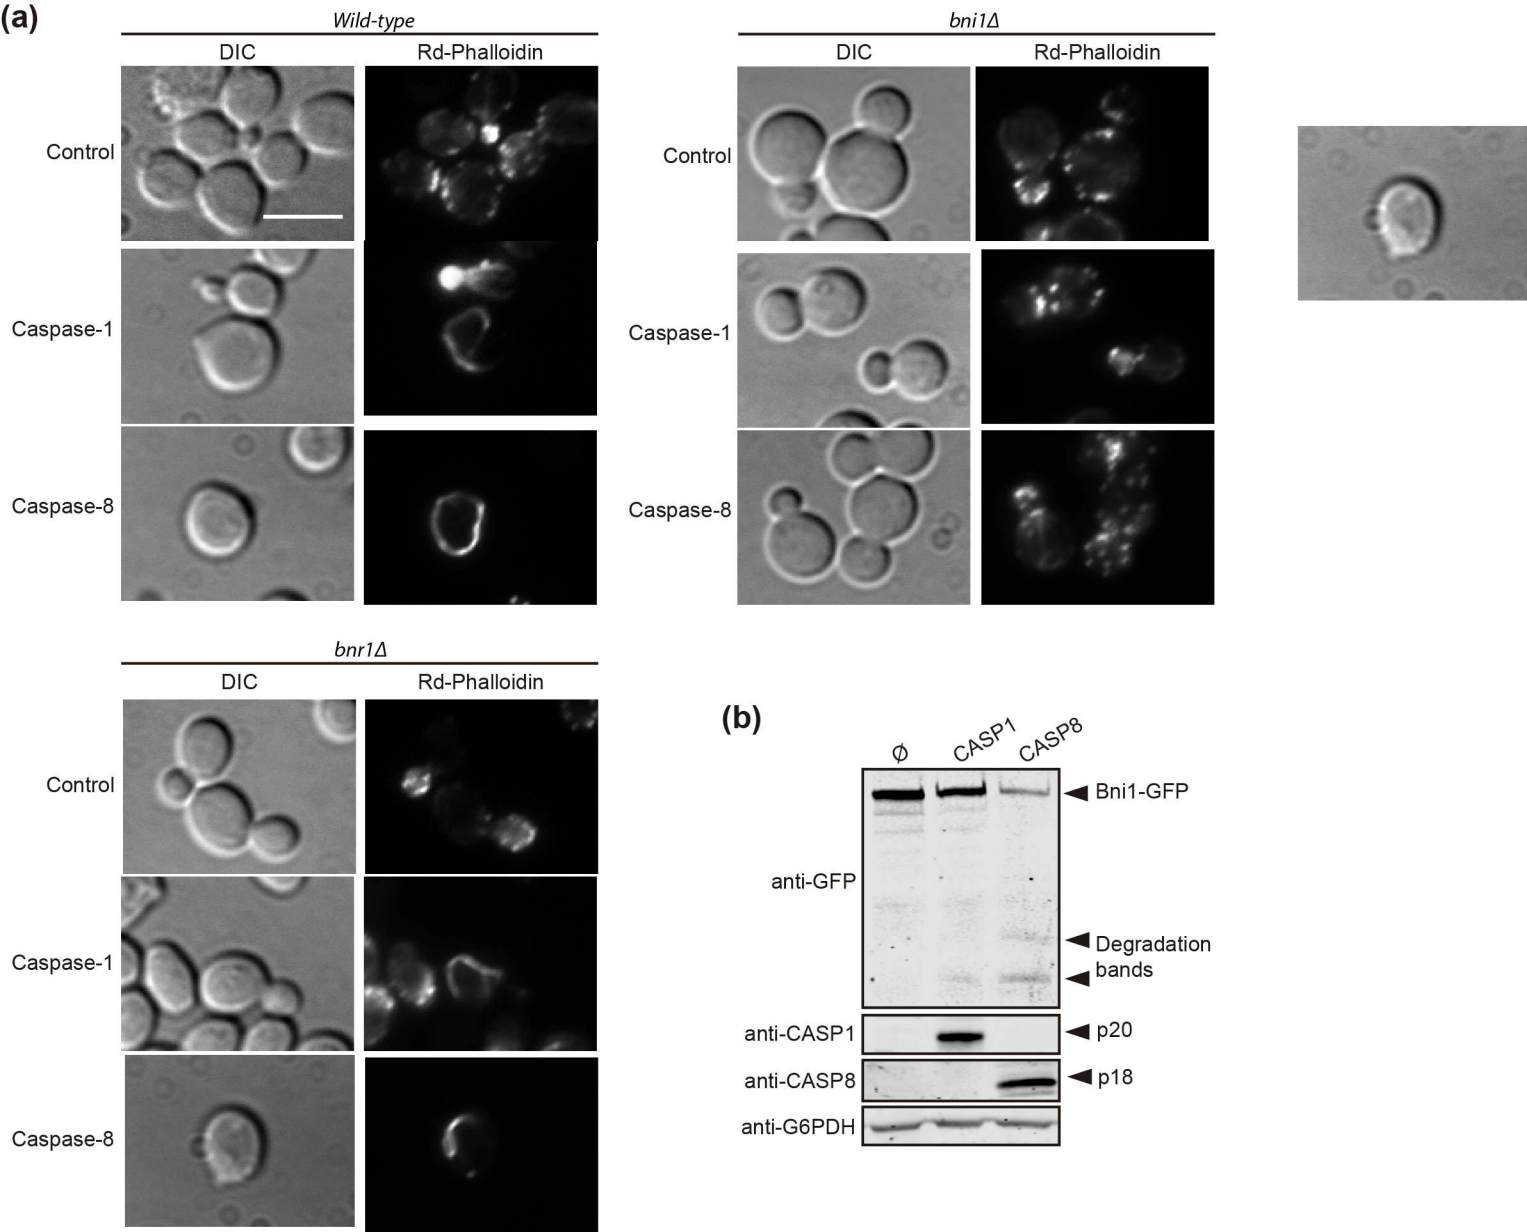

**(a)**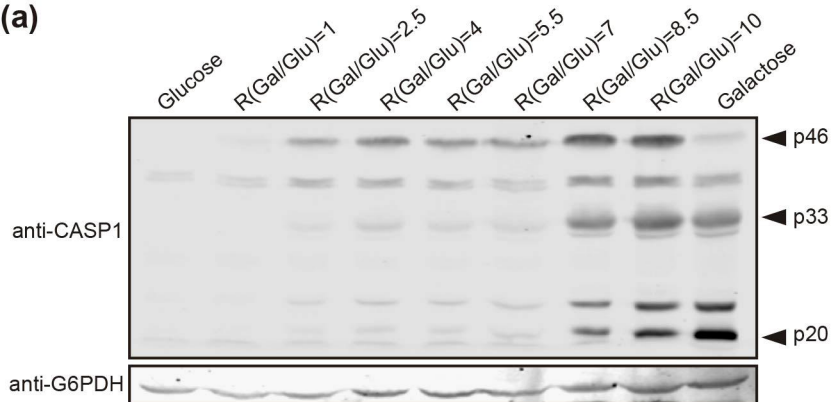**(b)**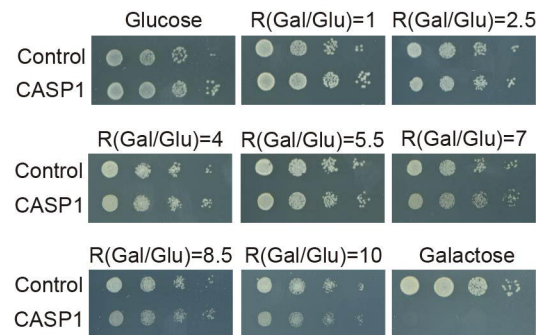**(c)**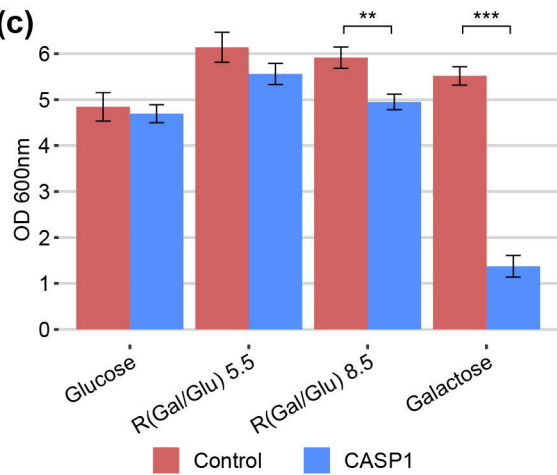**(d)**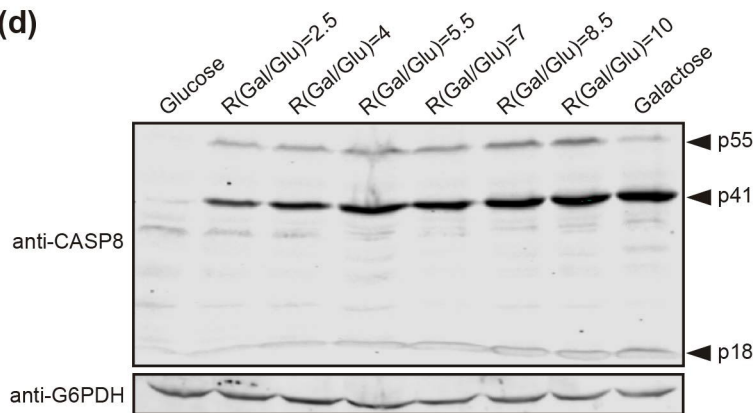

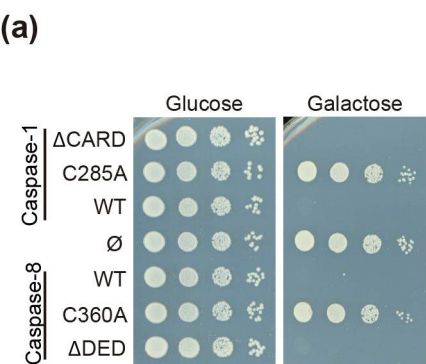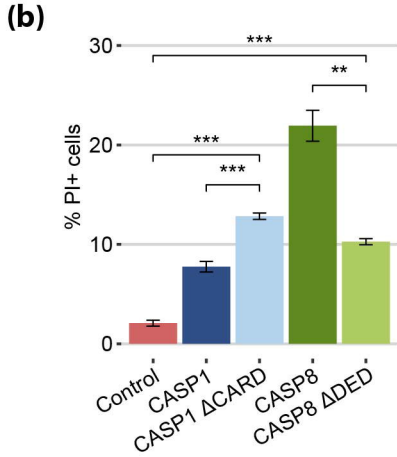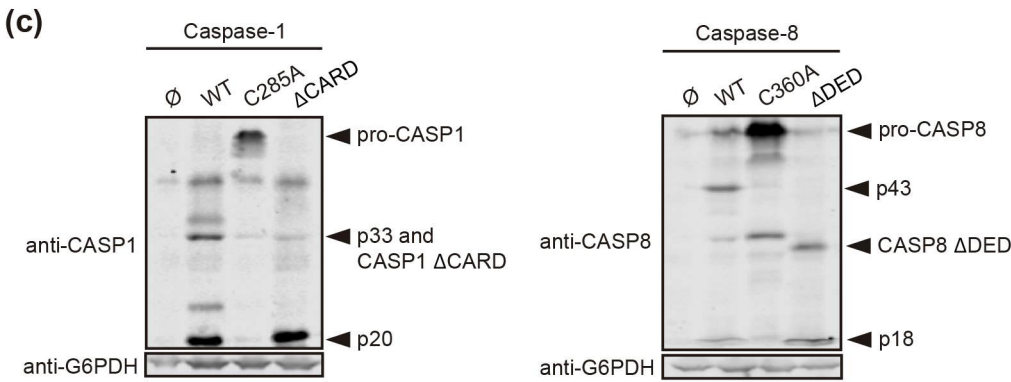

**(a)**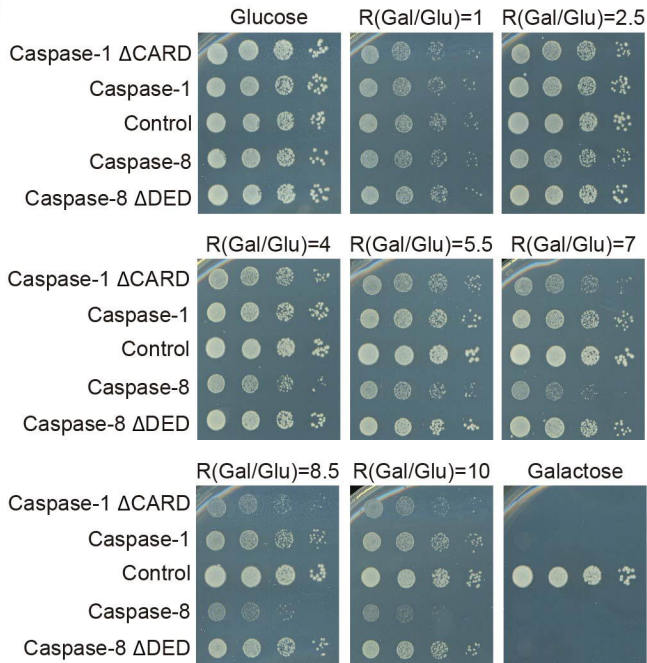**(b)**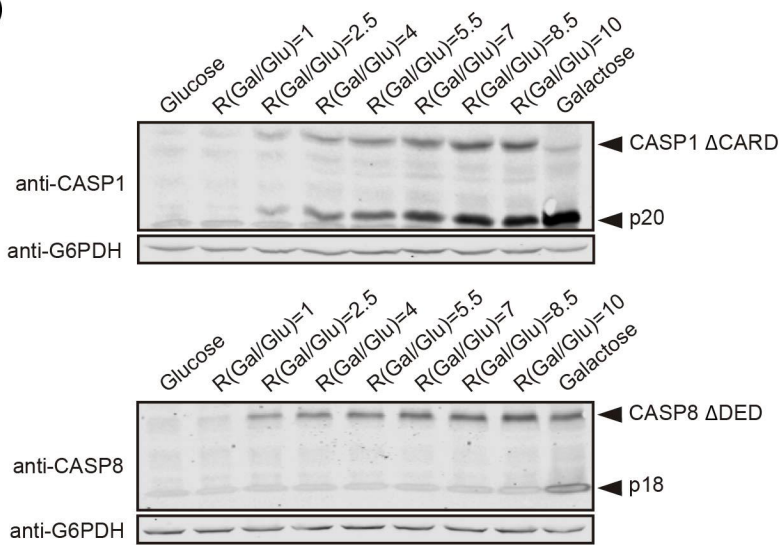

Source: http://biorxiv.org/content/10.1101/2021.02.07.430150v1.full.pdf
